# Supplementary material for: Indoor light-harvesting dye-sensitized solar cells surpassing 30% efficiency without co-sensitizers
Source: Royal Society of Chemistry journal article supplement (doi:10.1039/d1ma00829c), 2021-01-01
Supplement: d1ma00829c1.pdf [file d1ma00829c1.pdf]

*Electronic Supplementary Information (ESI)*

## **Indoor Light Harvesting Dye-sensitized Solar Cells Surpassing 30% Efficiency without Co-sensitizers**

Reethu Haridas<sup>a,b,‡</sup>, Jayadev Velore<sup>a,b,‡</sup>, Sourava Chandra Pradhan<sup>a,b</sup>, Asarikal Vindhysarumi<sup>a</sup>, Karuvath Yoosaf<sup>a,b,\*</sup>, Suraj Soman<sup>a,b,\*</sup>, K. N. Narayanan Unni<sup>a,b,\*</sup>, Ayyappanpillai Ajayaghosh<sup>a,b,\*</sup>

<sup>a</sup> Photosciences and Photonics Section, Chemical Sciences and Technology Division, CSIR-National Institute for Interdisciplinary Science and Technology (CSIR-NIIST), Thiruvananthapuram 695019, India. E-mail:suraj@niist.res.in, ajayaghosh@niist.res.in

<sup>b</sup> Academy of Scientific and Innovative Research (AcSIR), Ghaziabad-201002, India.

‡ These authors contributed equally to this work.

# Contents

## Supplementary Figures

|                                                                                                                                                                                                             |       |
|-------------------------------------------------------------------------------------------------------------------------------------------------------------------------------------------------------------|-------|
| <b>Fig. S1</b> : Cyclic and square wave voltammogram of YK 8 and YK 9.                                                                                                                                      | 3     |
| <b>Fig. S2 (a)</b> : Conventional architecture of DSCs.                                                                                                                                                     | 3     |
| <b>Fig. S2 (b)</b> : Photo of fabricated DSC devices.                                                                                                                                                       | 3     |
| <b>Fig. S3</b> : Optimization of semiconductor layer for YK 8 and YK 9 without CDCA                                                                                                                         | 4     |
| <b>Fig. S4</b> : Optimization of co-adsorbent concentration for YK 8 and YK 9.                                                                                                                              | 5     |
| <b>Fig. S5</b> : Absorption spectra of dyes YK 8 and YK 9 adsorbed on TiO <sub>2</sub> .                                                                                                                    | 6     |
| <b>Fig. S6 (a)</b> : Current density - voltage (J-V) characteristics                                                                                                                                        | 6     |
| <b>(b)</b> : Incident photon-to-current conversion efficiency (IPCE) and integrated $J_{sc}$ calculated from IPCE spectra for DSCs fabricated using YK 8 and YK 9 dyes after ageing the devices for 2700 h. | 6     |
| <b>Fig. S7 (a)</b> : Current density - voltage (J-V) characteristics of YK 8 and MK 2.                                                                                                                      | 7     |
| <b>Fig. S7 (b)</b> : IPCE spectra of YK 8 and MK 2.                                                                                                                                                         | 7     |
| <b>Fig. S8 (a)</b> : Photovoltaic characteristics of DSCs in indoor-light for YK 8 sensitizer (in cool-white compact fluorescent lamp) at 700 lux, 1000 lux, 1500 lux and 2000 lux.                         | 8     |
| <b>Fig. S8 (b)</b> : Photovoltaic characteristics of DSCs in indoor-light for MK 2 sensitizer (in cool-white compact fluorescent lamp) at 700 lux, 1000 lux, 1500 lux and 2000 lux.                         | 8     |
| <b>Fig. S8 (c)</b> : Variation of $\pi$ -spacer and its influence on indoor PV performance of organic D- $\pi$ -A dyes at standard 1000 lux                                                                 | 8     |
| <b>Fig. S9</b> : Self-powered temperature sensor.                                                                                                                                                           | 9     |
| <b>Fig. S10</b> : Nyquist plots for YK 8 and YK 9 near to open-circuit potential.                                                                                                                           | 9     |
| <b>Fig. S11</b> : Chemical capacitance ( $C_{\mu}$ ) as a function of corrected voltage ( $V_F$ ).                                                                                                          | 10    |
| <b>Fig. S12</b> : Dark current as function of corrected voltage (VF) calculated from EIS.                                                                                                                   | 10    |
| <b>Fig. S13</b> : Lifetime ( $\tau_n$ ) as a function of LED current from IMVS.                                                                                                                             | 11    |
| <b>Fig. S14</b> : The home-made indoor/artificial light measurement setup.                                                                                                                                  | 12    |
| <b>Fig. S15 (i-xxxiii)</b> : Structural characterization of YK 8 and YK 9 ( <sup>1</sup> H NMR, <sup>13</sup> C NMR and HRMS).                                                                              | 13-29 |
| <b>Fig. S15 (xxxiv)</b> : ATR-FTIR spectra of YK8 and YK 9 dyes.                                                                                                                                            | 29-33 |
| <b>Fig. S16</b> : Newport class AAA solar simulator.                                                                                                                                                        | 40    |
| <b>Fig. S17</b> : Standard silicon reference cell calibrated by Newport.                                                                                                                                    | 41    |
| <b>Fig. S18</b> : IPCE measurement setup.                                                                                                                                                                   | 42    |
| <b>Fig. S19</b> : Detector and silicon reference cell for IPCE measurement.                                                                                                                                 | 42    |

## Supplementary Tables

|                                                                                                                                   |       |
|-----------------------------------------------------------------------------------------------------------------------------------|-------|
| <b>Table S1</b> : Optimization of semiconductor layer for YK 8 and YK 9 without CDCA                                              | 34    |
| <b>Table S2</b> : Optimization of co-adsorbent concentration for (a) YK 8 and (b) YK 9.                                           | 34    |
| <b>Table S3</b> : Solar cell characteristics of DSCs based on MK 2 sensitizer.                                                    | 35    |
| <b>Table S4</b> : Summary of photovoltaic performance of DSCs based on YK 8 and YK 9 dyes after ageing the devices for 2700 h.    | 35    |
| <b>Table S5</b> : Photovoltaic performance of DSCs in indoor-light for MK 2 sensitizer in cool-white compact fluorescent lamp.    | 35    |
| <b>Table S6</b> : Comparison of the indoor photovoltaic performance of YK 8 and YK 9 sensitizers with other dyes reported so far. | 36    |
| <b>Table S7</b> : List of highest reported indoor performance using DSCs.                                                         | 37    |
| <b>Table S8</b> : YK 8 dye cost calculation.                                                                                      | 37-39 |

## References

43

## FIGURES

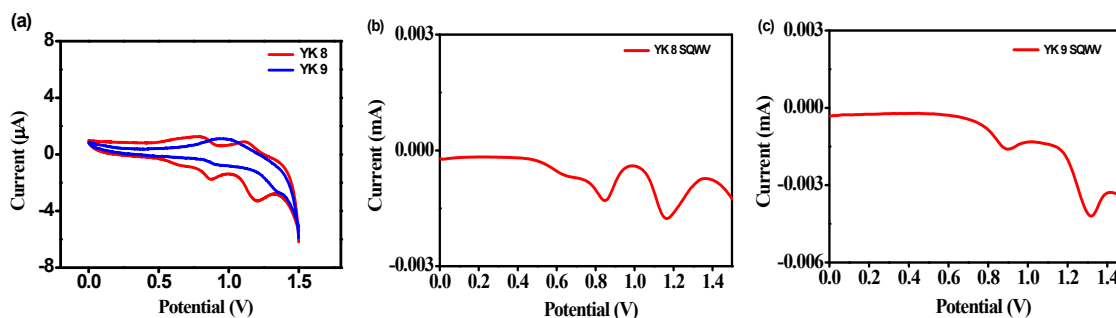

**Figure S1.** (a) Cyclic voltammogram of YK 8 and YK 9 and square wave voltammogram of (b) YK 8 and (c) YK 9 respectively.

The HOMO and LUMO levels of the dyes were calculated from first half wave potentials obtained from cyclic voltammogram (confirmed by square wave voltammogram) using the equations given below.

$$\begin{aligned}
 E_{gap} &= 1240/\lambda \\
 E_{HOMO} &= - [4.8 + E_{ox/red} - E_{Fc}] \\
 E_{LUMO} &= E_{HOMO} - E_{gap}
 \end{aligned}$$

Where,

$E_{ox/red}$  - denotes the oxidation/reduction potential of the dye

$E_{Fc}$  - denotes the oxidation potential of Ferrocene

$\lambda$  - denotes the absorption onset value

All the obtained potentials were converted to NHE by considering  $Fc/Fc^+$  as +0.765 V vs NHE in DCM

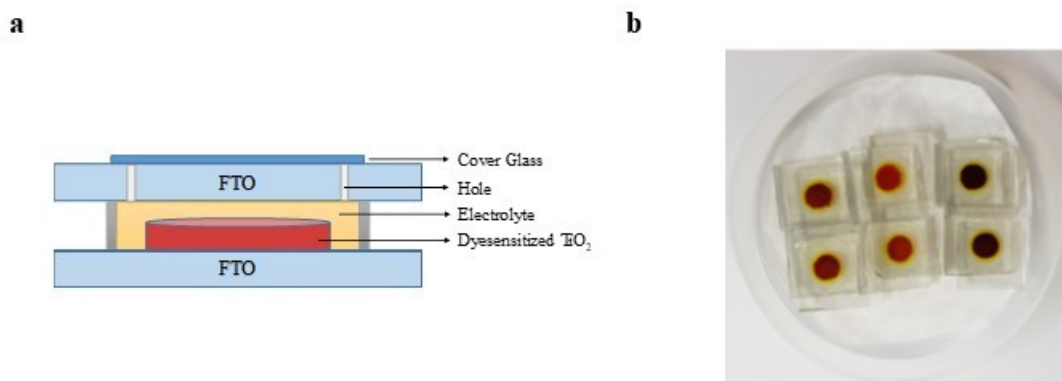

**Figure S2.** (a) DSC architecture employed in the present study (b) Image of fabricated DSC devices with YK 8, YK 9 and MK2 sensitizers

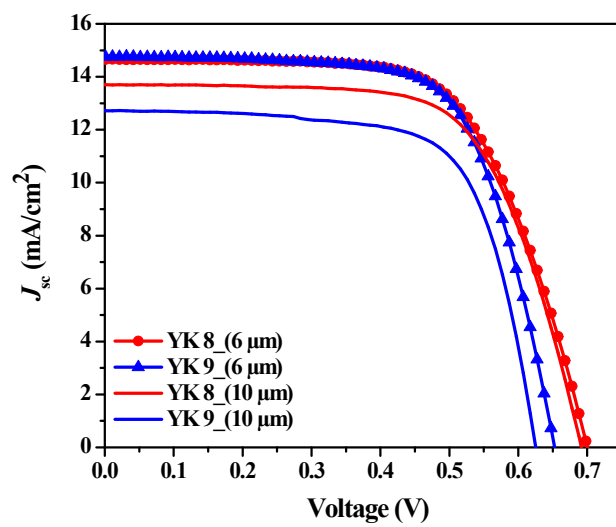

**Figure S3.** Current density - voltage (J-V) characteristics for the optimization of semiconductor architecture for YK 8 and YK 9 without CDCA.

a

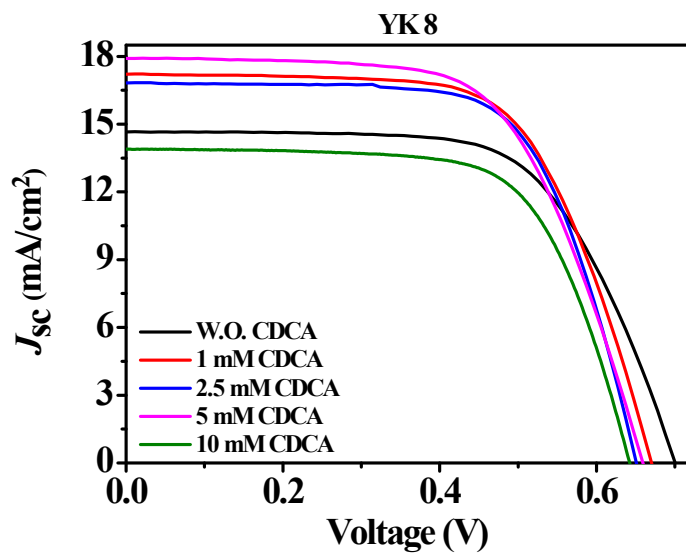

b

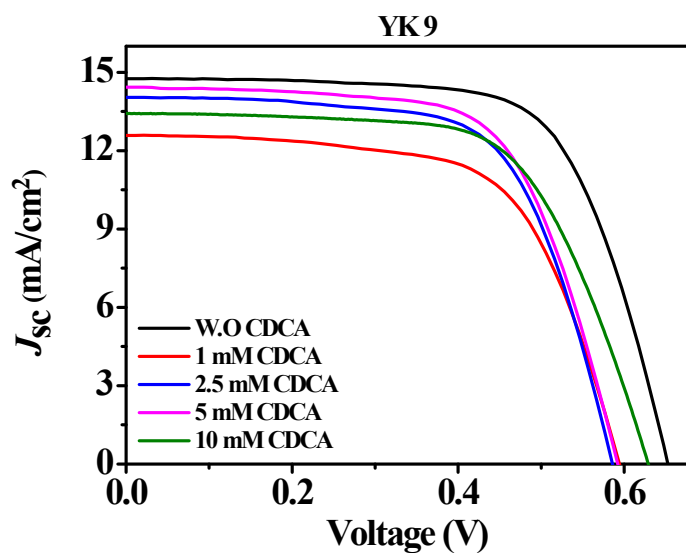

**Figure S4.** Current density - voltage ( $J$ - $V$ ) characteristics for optimization of co-adsorbent concentration for a) YK 8 and b) YK 9.

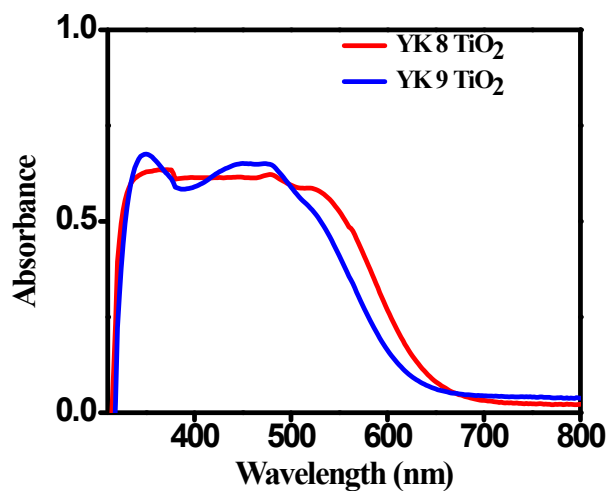

**Figure S5.** Absorption spectra of dyes YK 8 and YK 9 adsorbed on TiO<sub>2</sub>.

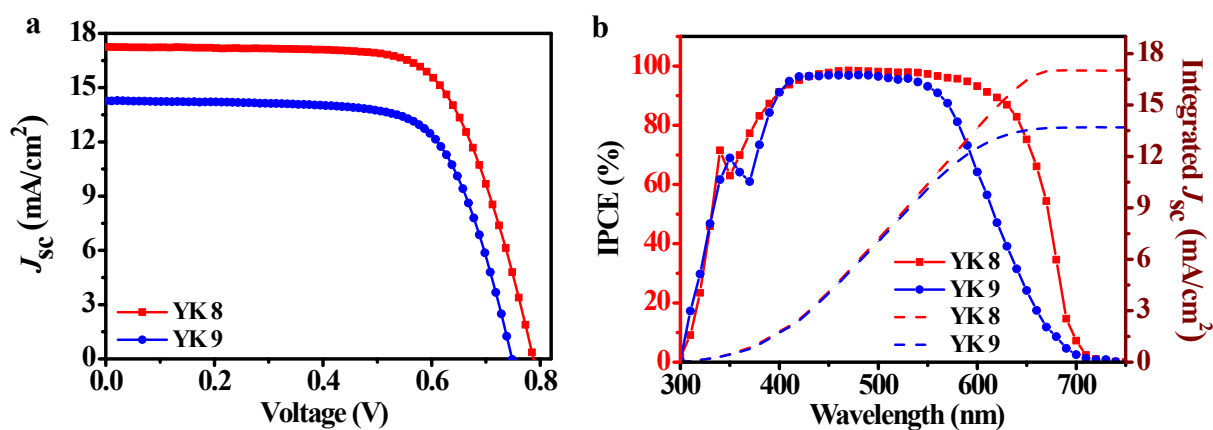

**Figure S6.** (a) Current density - voltage (J-V) characteristics (b) Incident photon-to-current conversion efficiency (IPCE) and integrated  $J_{sc}$  calculated from IPCE spectra for DSCs fabricated using YK 8 and YK 9 dyes after ageing the devices for 2700 h.

a

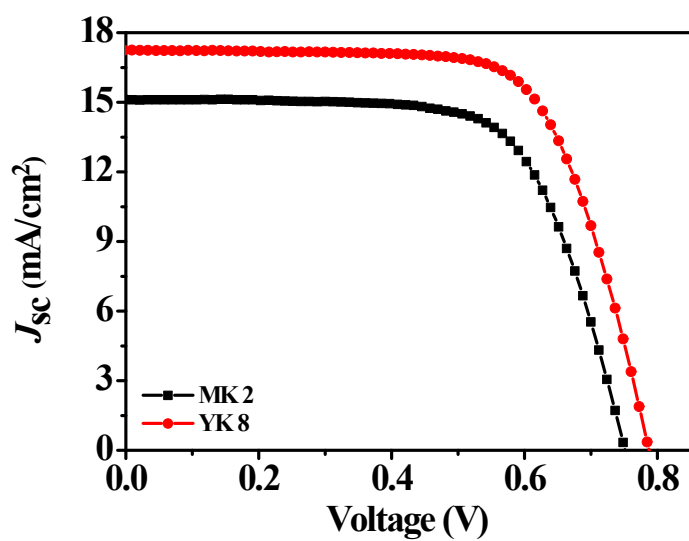

b

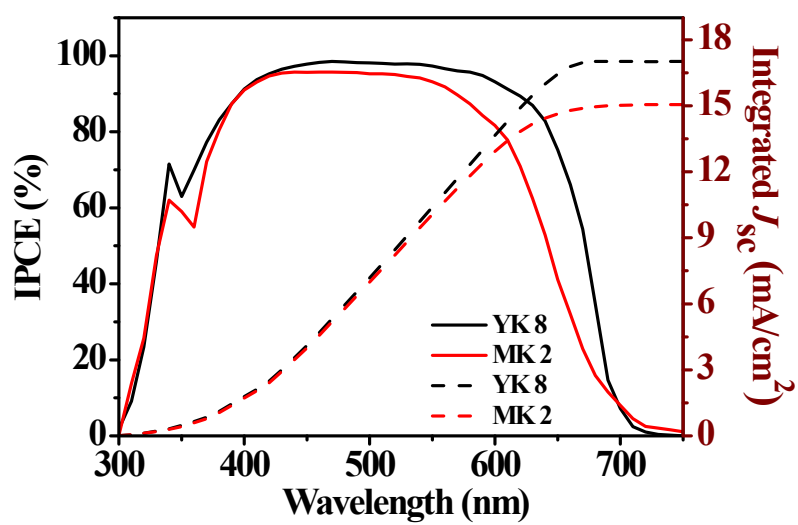

**Figure S7.** (a) Current density - voltage ( $J$ - $V$ ) characteristics and (b) IPCE for YK 8 and MK 2.

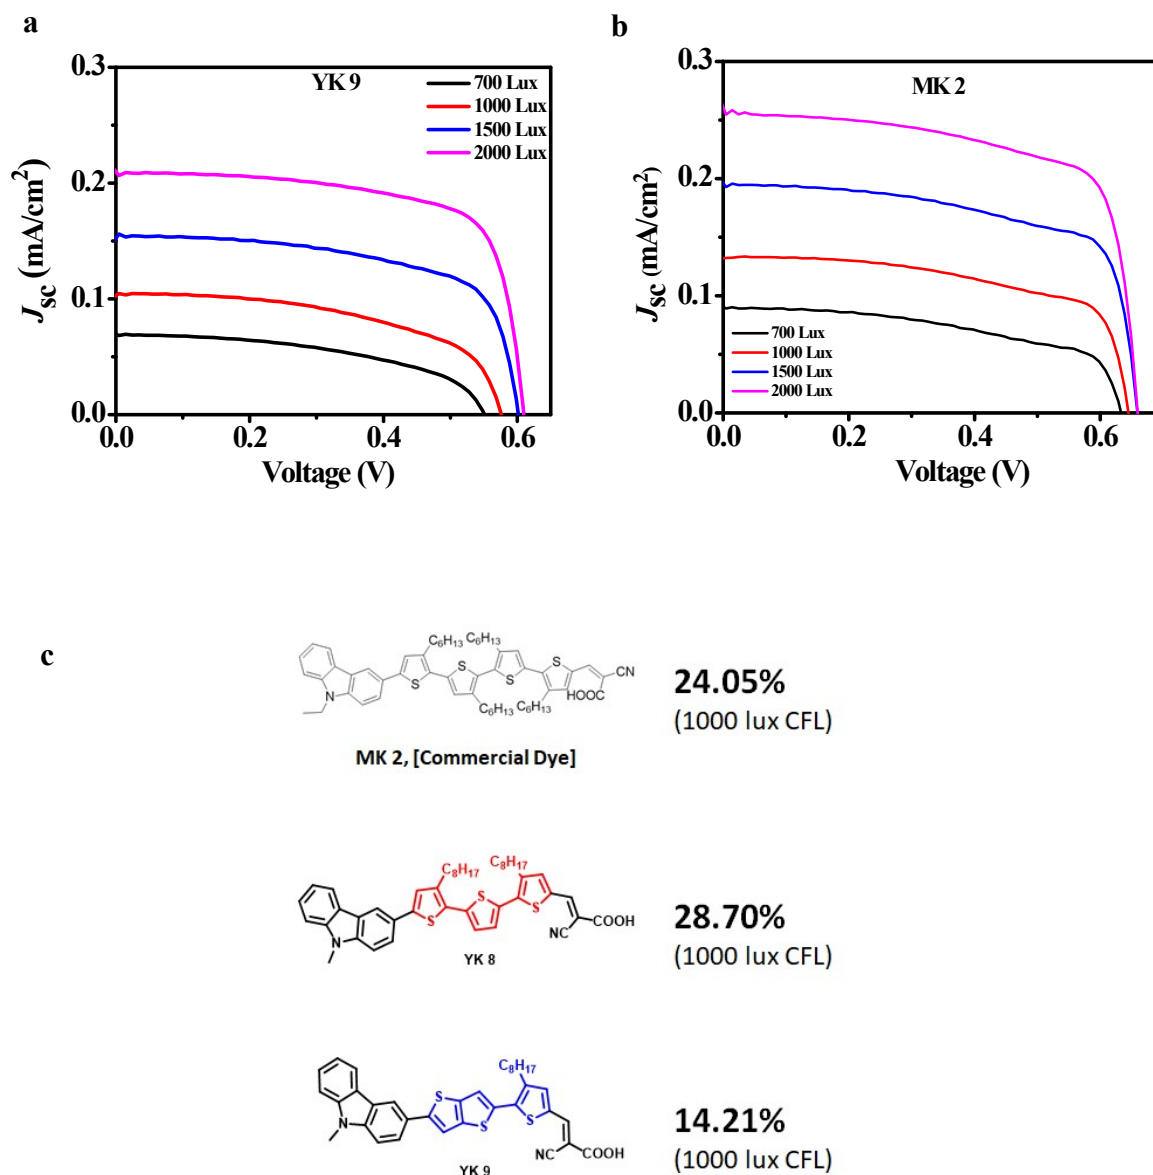

**Figure S8.** Current density - voltage ( $J$ - $V$ ) characteristics of DSCs under indoor light for (a) YK 9 and (b) MK 2 sensitizer (Osram 14 W T2 cool day light fluorescent tube illumination) at 700 lux, 1000 lux, 1500 lux and 2000 lux intensities (c) Variation of  $\pi$ -spacer and its influence on indoor PV performance of organic D- $\pi$ -A dyes at standard 1000 lux.



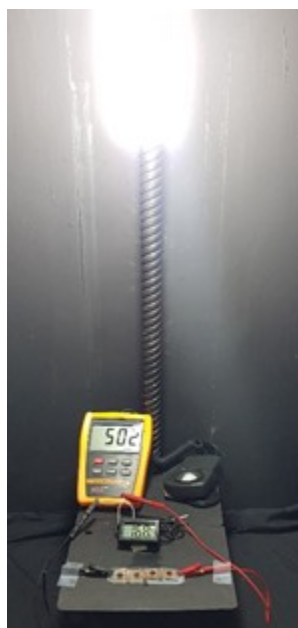

**Figure S9.** Image of self-powered temperature sensor with LCD display at 500 lux (Osram 14 W T2 cool day light fluorescent tube illumination) integrated with four serially connected DSCs fabricated with YK 8 sensitizer.

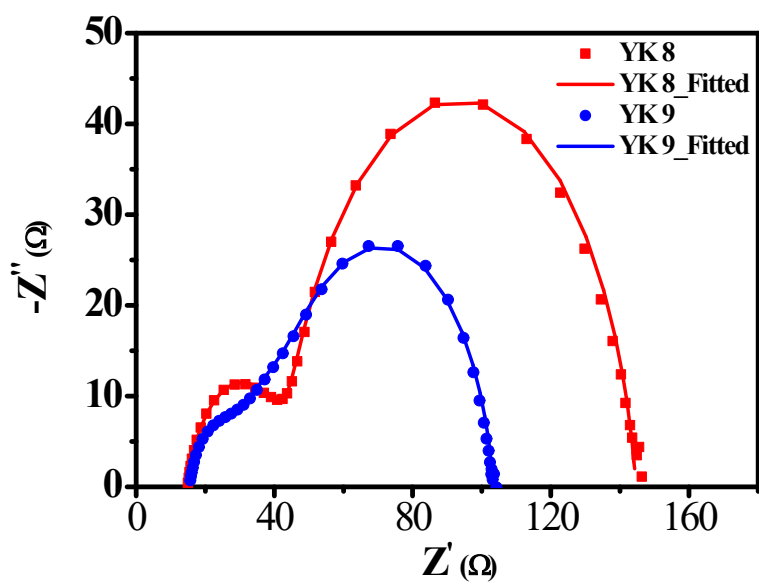

**Figure S10.** Nyquist plot obtained for YK 8 and YK 9 dyes.

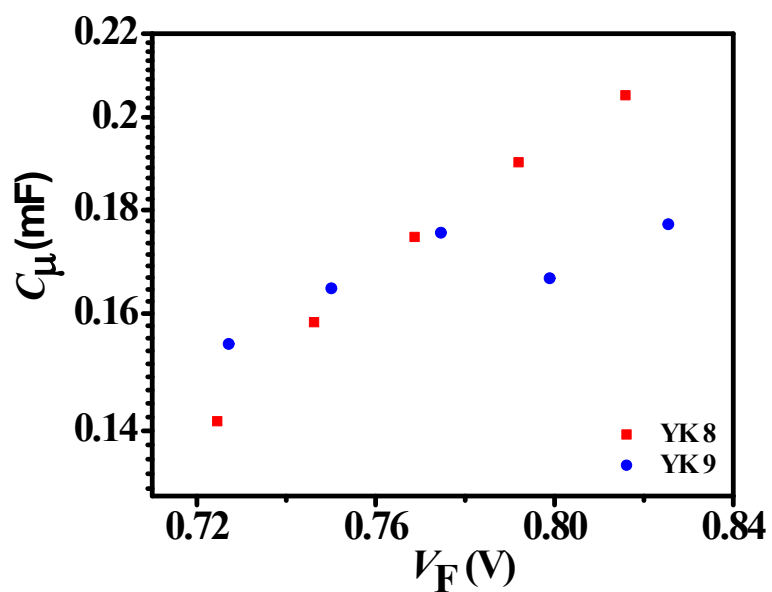

**Figure S11.** Chemical capacitance ( $C_{\mu}$ ) as a function of corrected voltage ( $V_F$ ) for YK 8 and YK 9 dyes.

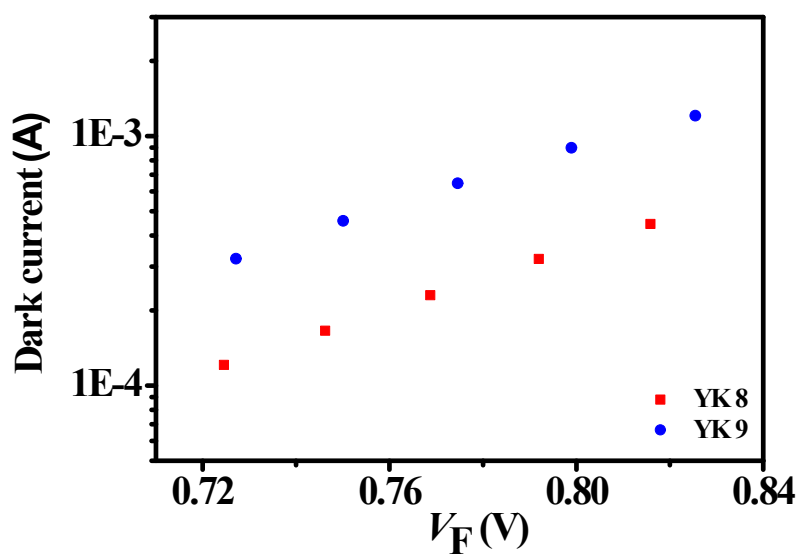

**Figure S12.** Dark current as function of corrected voltage ( $V_F$ ) calculated from EIS for YK 8 and YK 9 dyes.

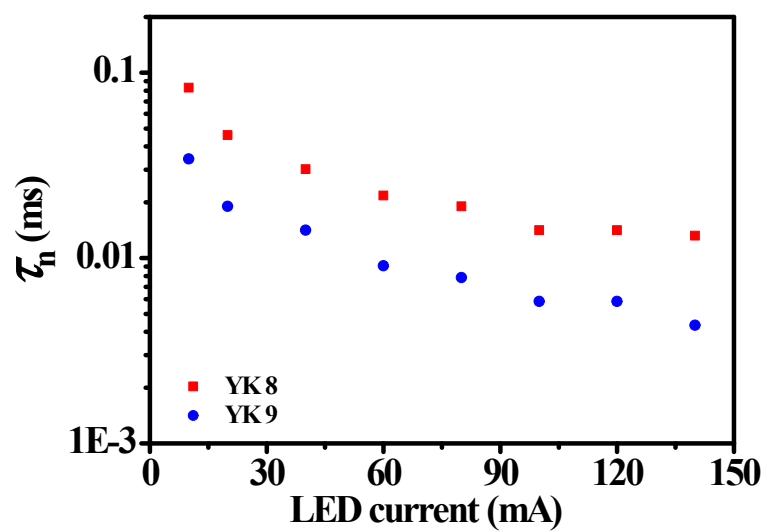

**Figure S13.** Lifetime ( $\tau_n$ ) as a function of LED current measured using IMVS technique for YK 8 and YK 9 dyes.

## Indoor light measurements

The indoor light measurements were performed in a home-made indoor light measurement setup (Black Chamber) using Osram 14 W T2 cool day light fluorescent tube as the source of illumination. The spectrum of the lamp was recorded using a portable spectroradiometer (PR-655) from Photo Research Inc. The light intensity was calibrated and measured using high sensitivity certified irradiance measuring unit from Dyenamo AB (DN-AE06). The measurement system consists of a high-sensitivity thermal (thermopile) sensor (Thorlabs, Model: S401C and S/N: 01414) and USB power meter (Thorlabs, Model: PM100USB and S/N: P2010346), which are connected through the software provided by Dyenamo AB. This was cross verified by integrating the spectra also obtained using spectroradiometer. The  $J-V$  measurements under lower intensities were measured using a certified low power measuring unit from Dyenamo AB which was custom made for carrying out low-light (indoor ambient light) measurements with maximum accuracy (Model: DN-AE05, S/N: 0015). For Indoor Light Measurements, we have taken all preventive measures and used certified characterization tools to prevent any sort of error and issues commonly resulting from the over estimation of PV performance. We not only cover the edge of the solar cell with a black mask but also kept the devices on black surface. In addition, during the measurements we made the room absolutely dark in order to avoid any stray light. The home-made indoor/artificial light measurement setup is given below.

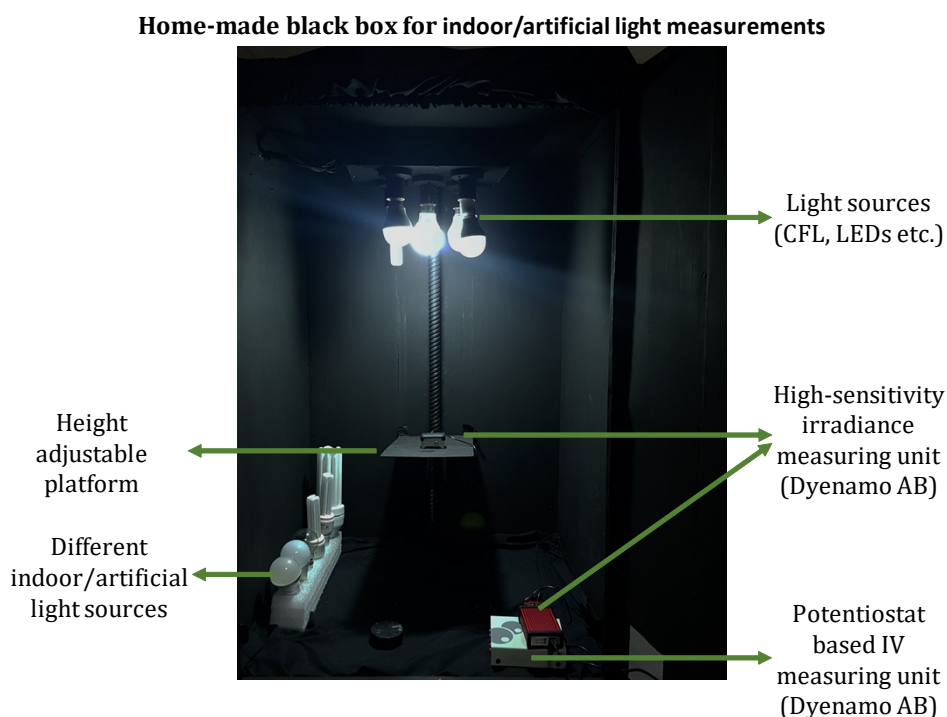

**Figure S14.** Home-made indoor/artificial light measurement setup integrated with Dyenamo potentiostat measuring unit, irradiance measuring unit, light source and height adjustable platform.

**Figure S15 (i-xxxiii).** Structural characterization of YK 8 and YK 9 dyes ( $^1\text{H}$  NMR,  $^{13}\text{C}$  NMR and HRMS)

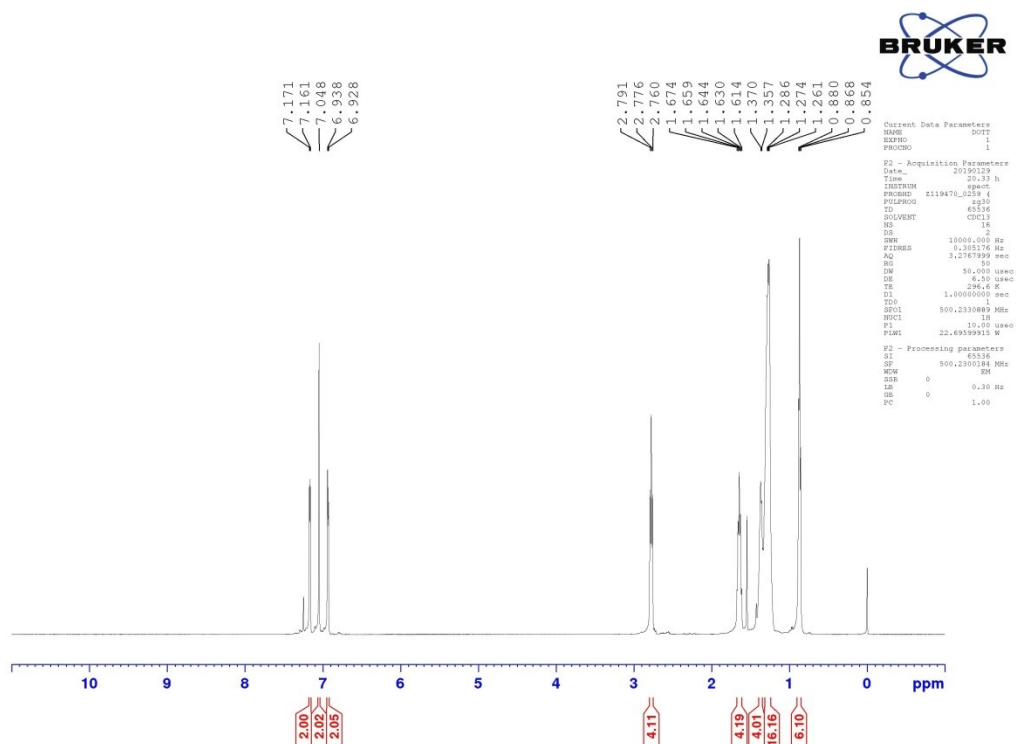

**Figure S15 (i).**  $^1\text{H}$  NMR spectrum of compound 1.

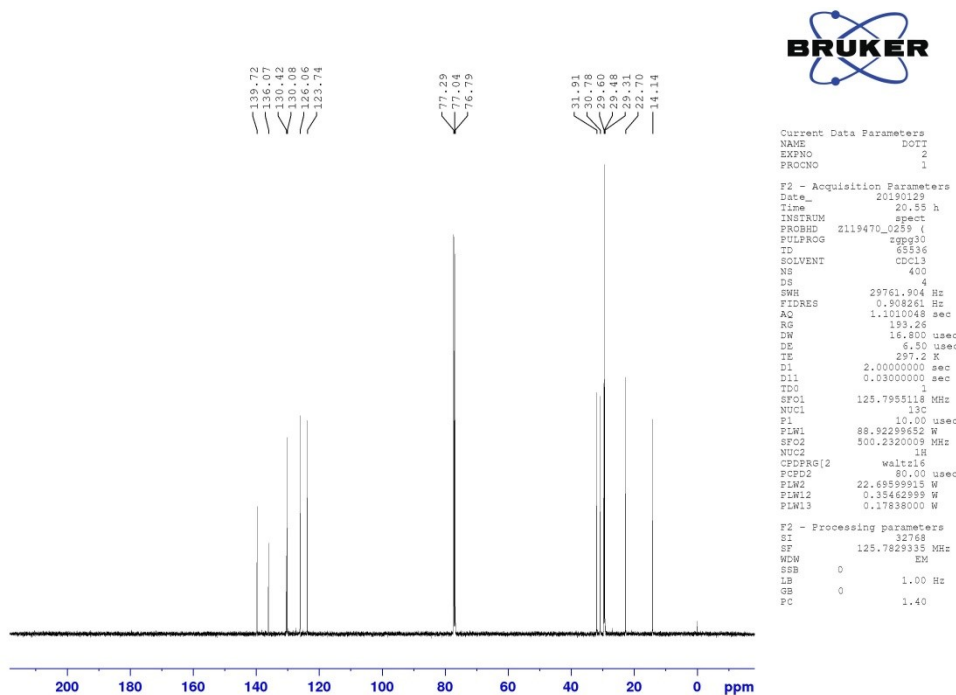

**Figure S15 (ii).**  $^{13}\text{C}$  NMR spectrum of compound 1.

DOTT-L\_180130164541 #307-339 RT: 5.31-5.75 AV: 33 NL: 2.22E7  
T: FTMS (1,1) + p ESI Full lock ms [100.00-1500.00]

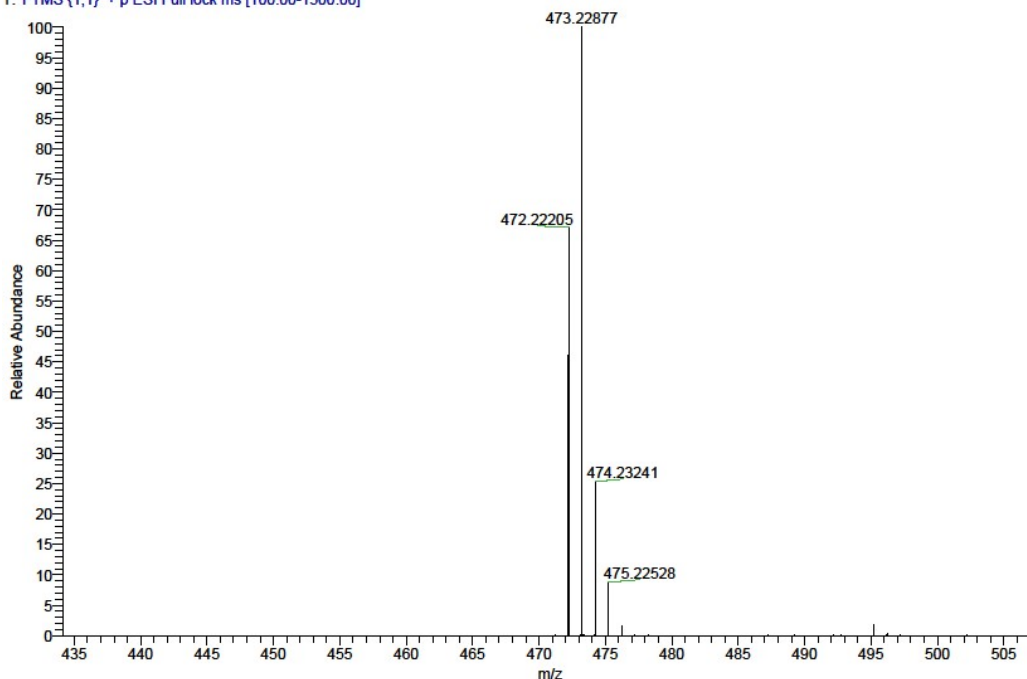

Figure S15 (iii). HRMS spectrum of compound 1.

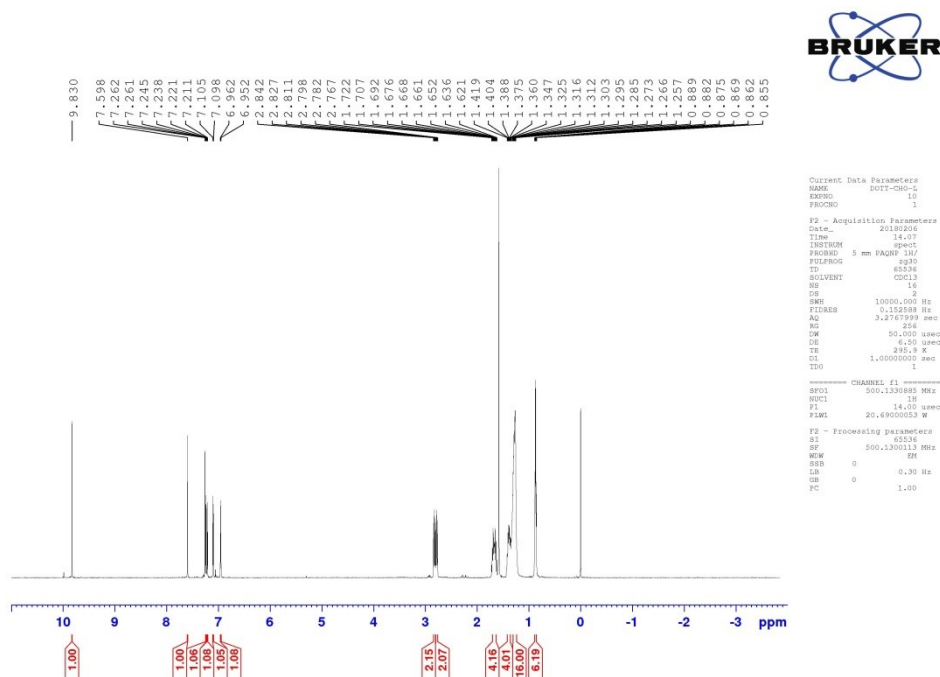

Figure S15 (iv). <sup>1</sup>H NMR spectrum of compound 2.

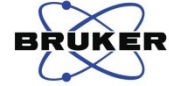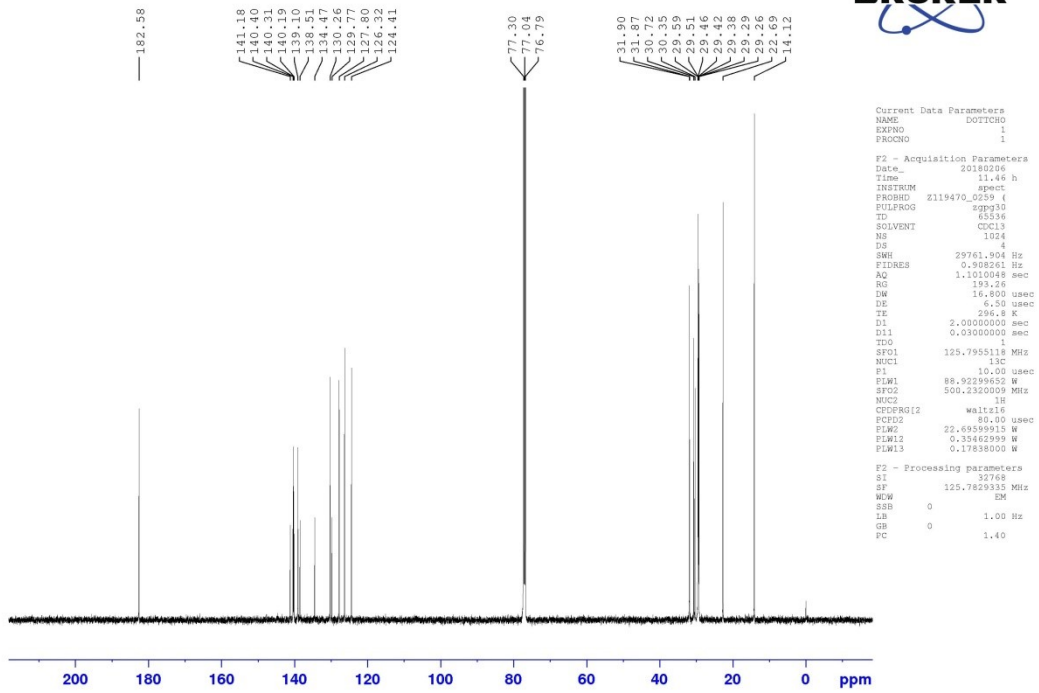

Figure S15 (v).  $^{13}\text{C}$  NMR spectrum of compound 2.

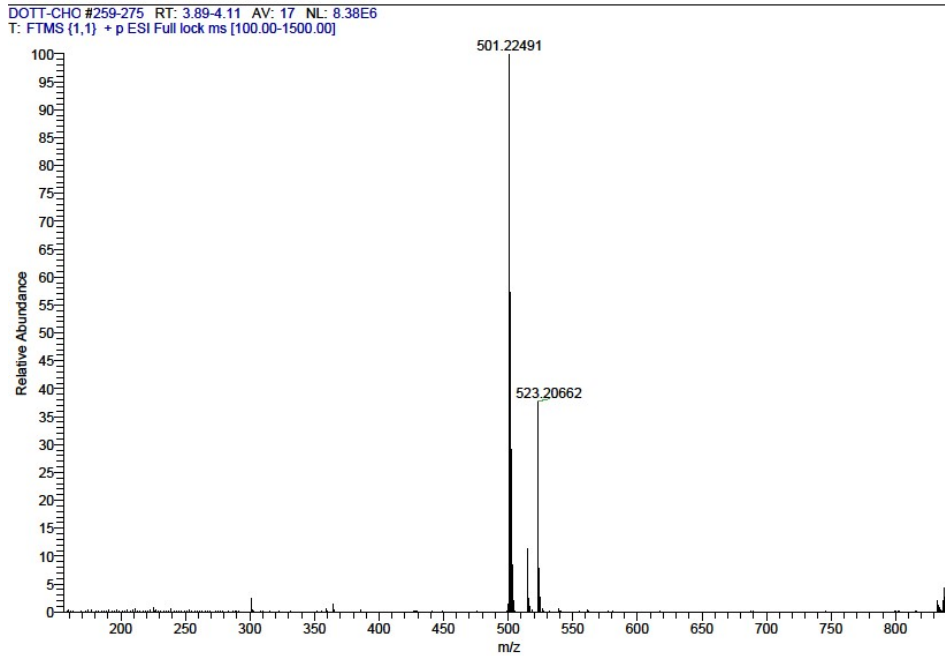

Figure S15 (vi). HRMS spectrum of compound 2.

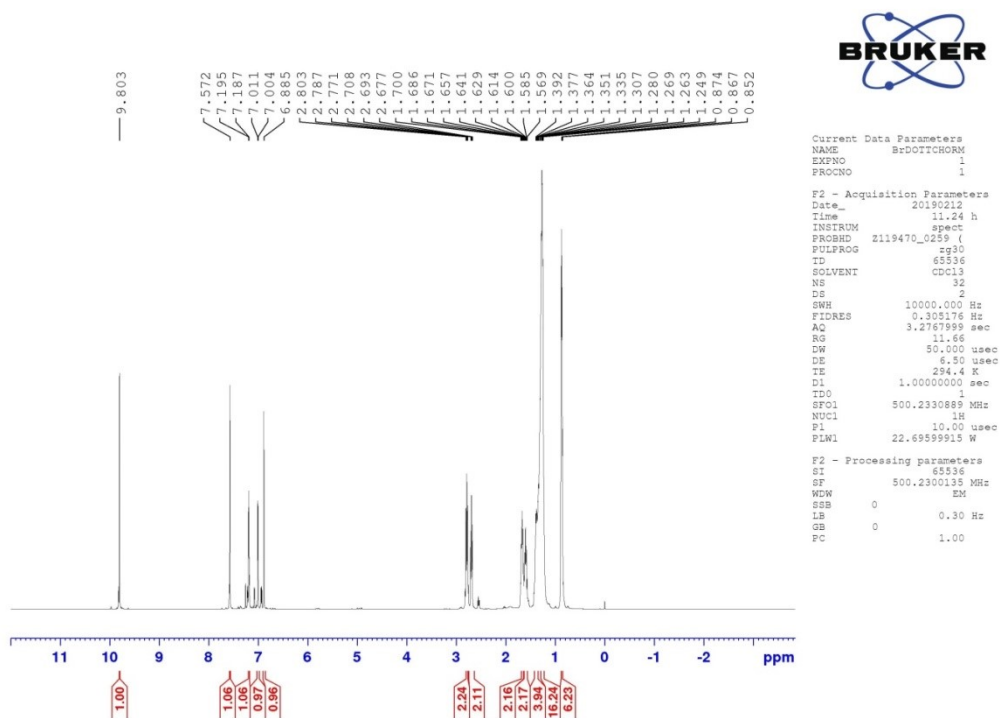

Figure S15 (vii). <sup>1</sup>H NMR spectrum of compound 3.

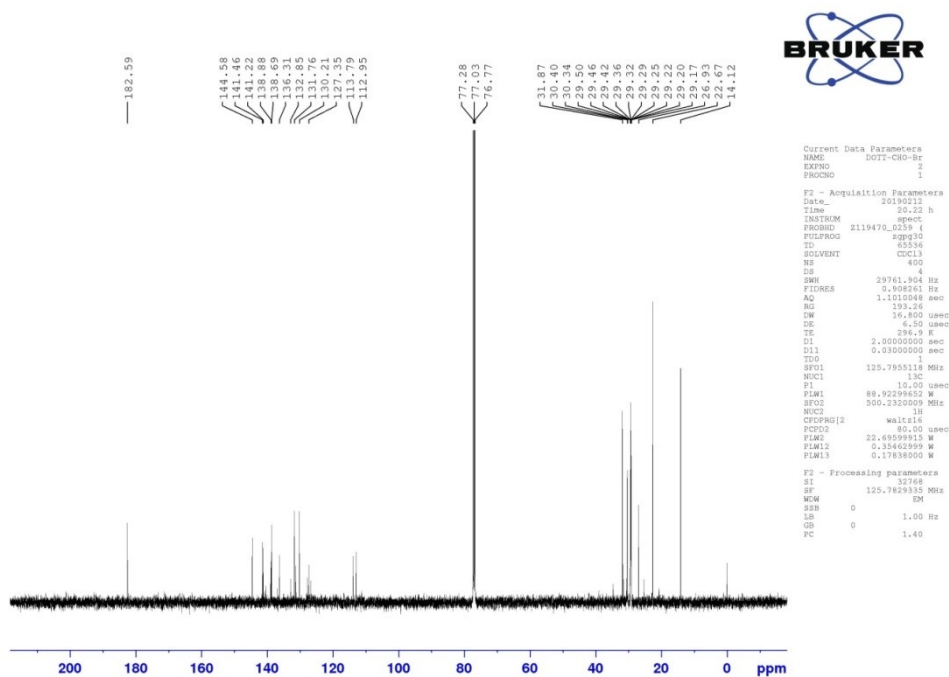

Figure S15 (viii). <sup>13</sup>C NMR spectrum of compound 3.



DOTTCHO-Br\_180205163322 #313-331 RT: 5.33-5.59 AV: 19 NL: 1.21E6  
T: FTMS (1,1) + p ESI Full ms [100.00-1500.00]

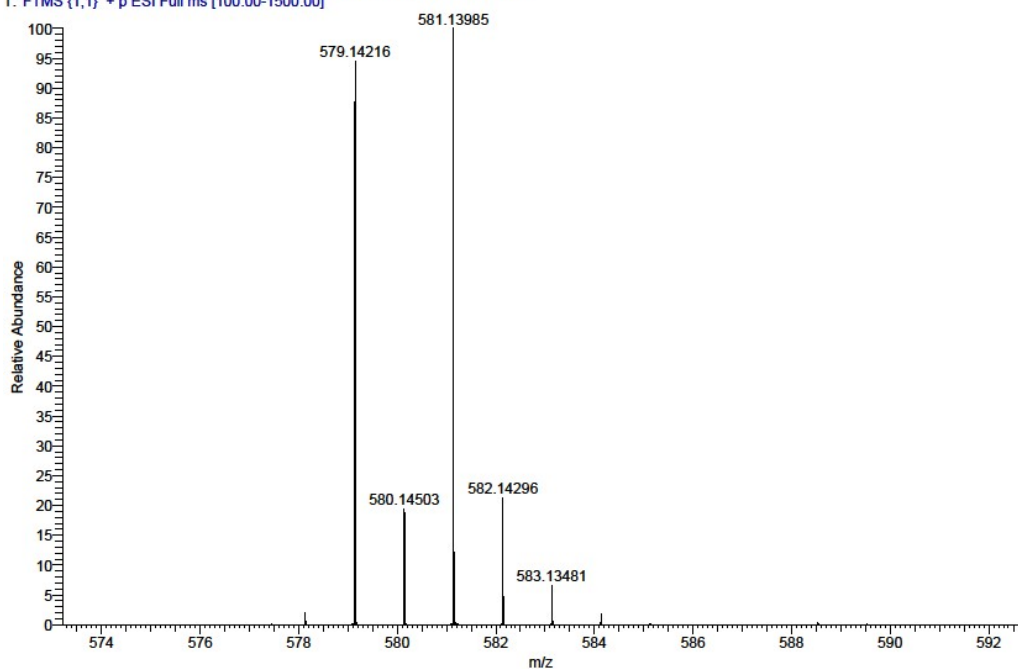

Figure S15 (ix). HRMS spectrum of compound 3.

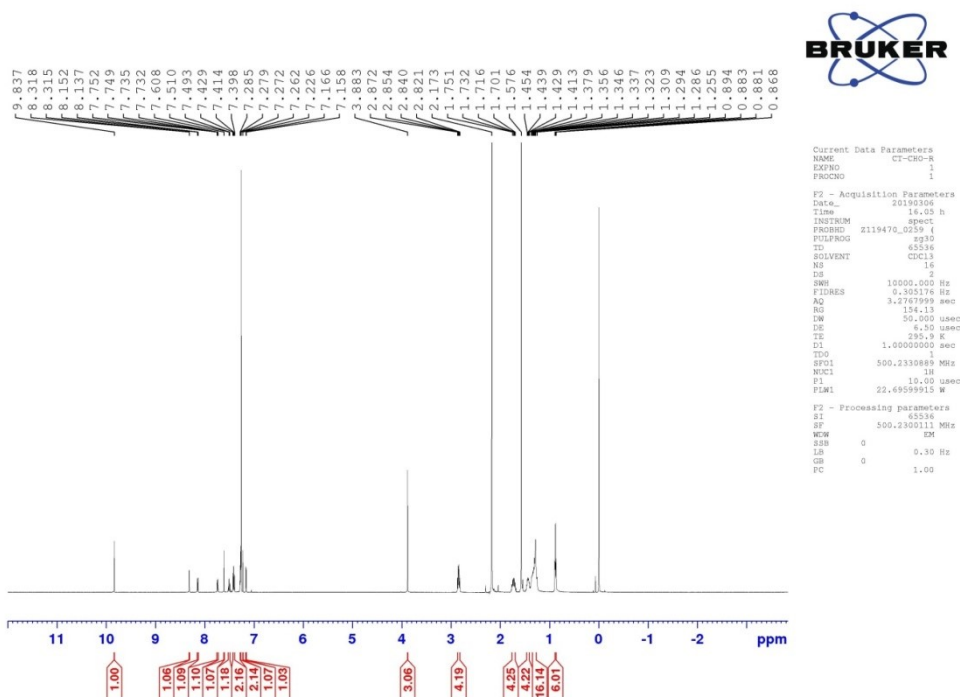

Figure S15 (x). <sup>1</sup>H NMR spectrum of compound 4.

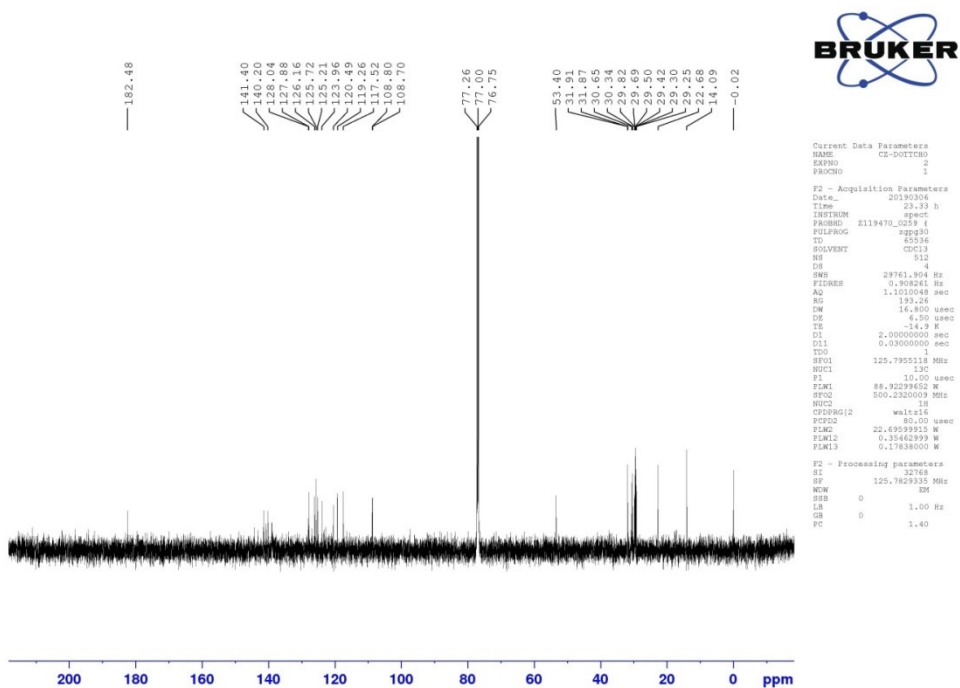

Figure S15 (xi).  $^{13}\text{C}$  NMR spectrum of compound 4.

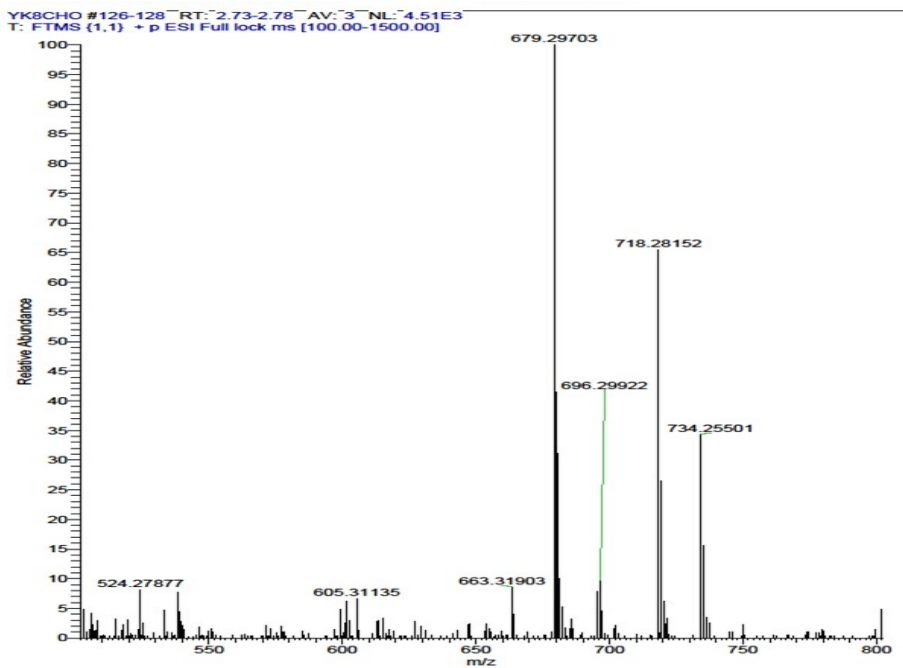

Figure S15 (xii). HRMS spectrum of compound 4.

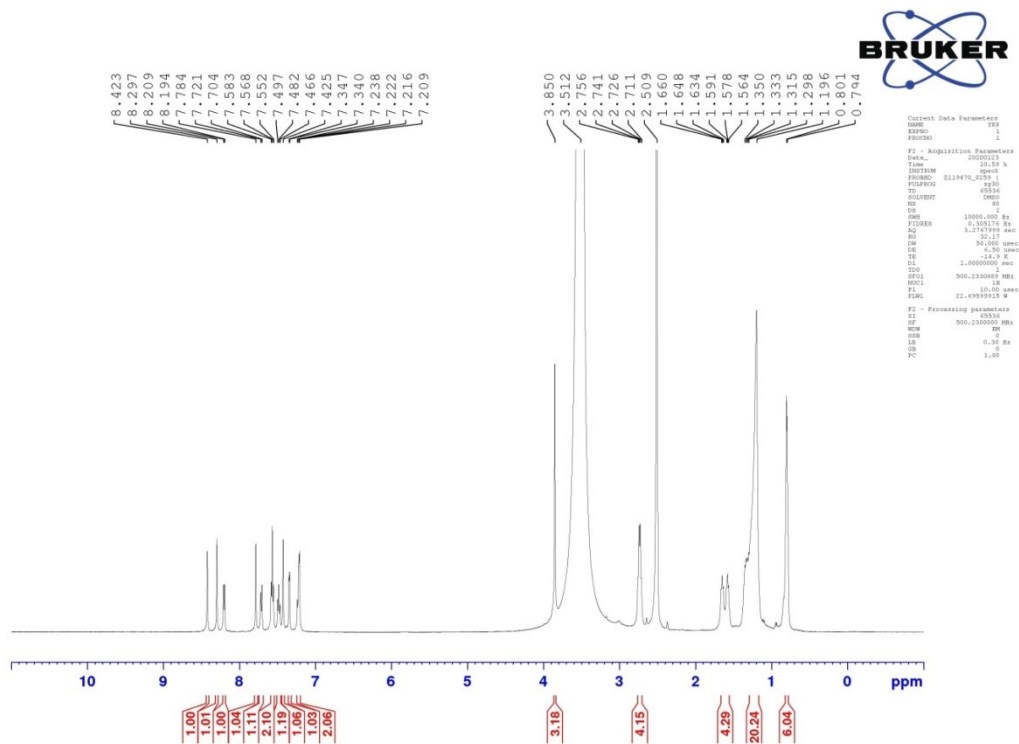

Figure S15 (xiii). <sup>1</sup>H NMR spectrum of YK 8 dye.

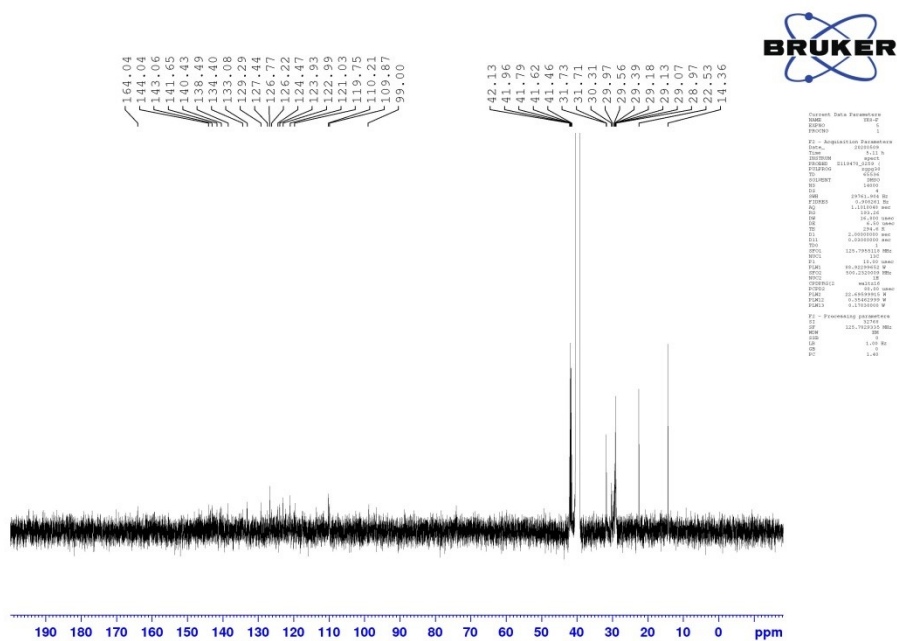

Figure S15 (xiv). <sup>13</sup>C NMR spectrum of YK 8 dye.

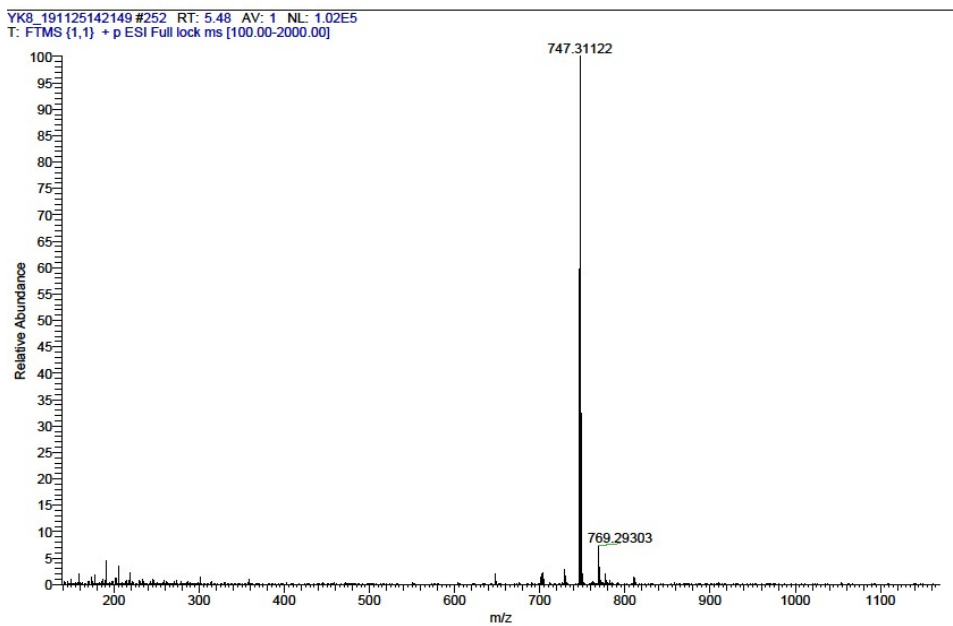

Figure S15 (xv). HRMS spectrum of YK 8 dye.

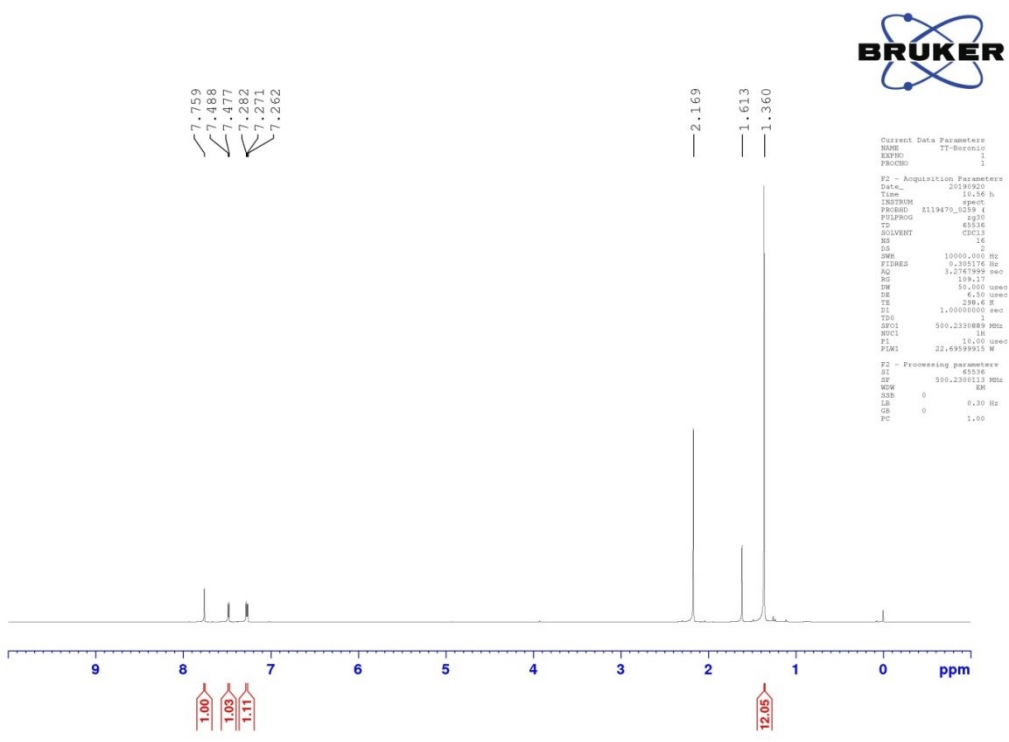

Figure S15 (xvi). <sup>1</sup>H NMR spectrum of compound 5.

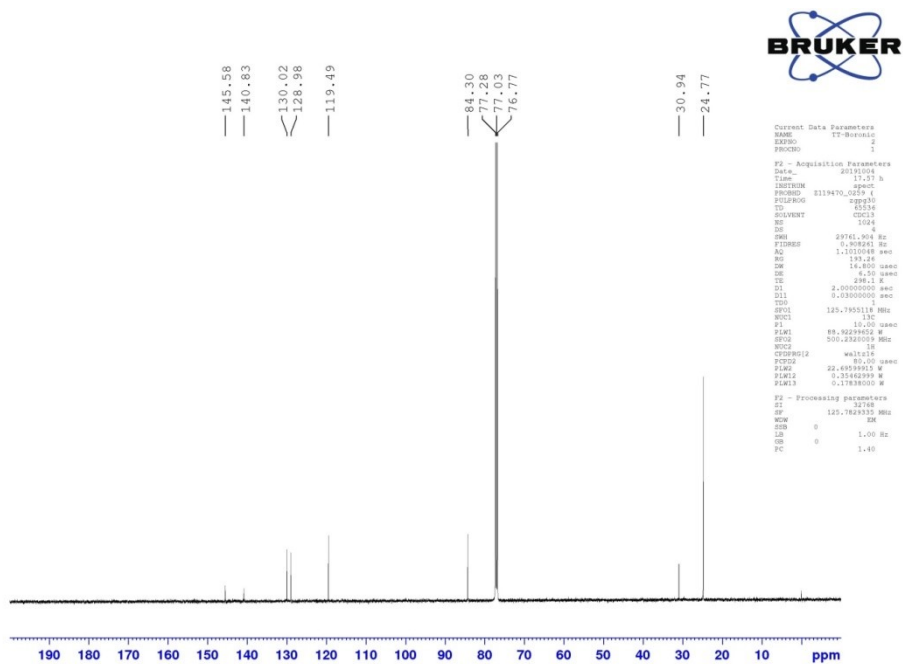

Figure S15 (xvii).  $^{13}\text{C}$  NMR spectrum of compound 5.

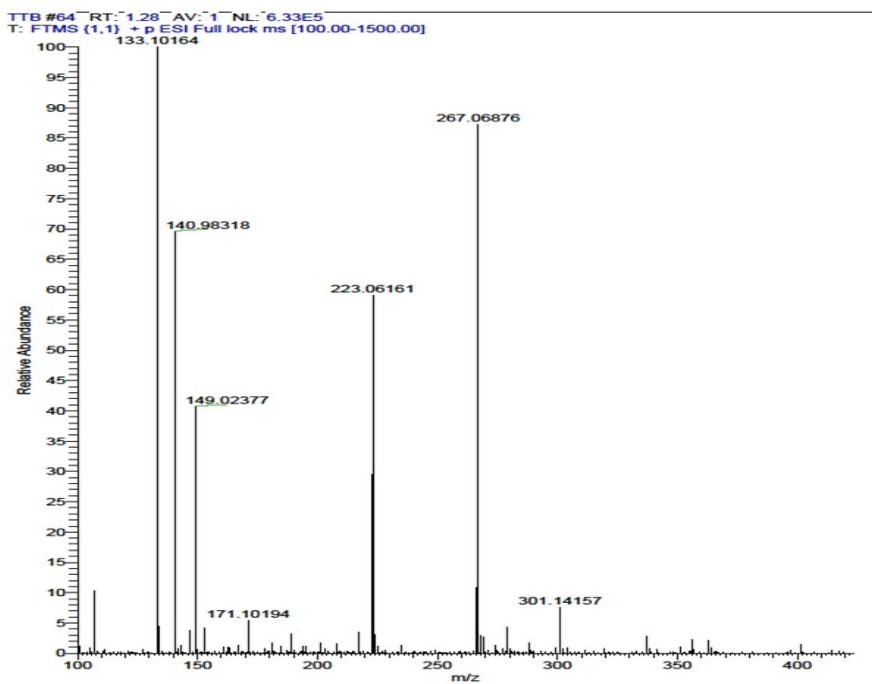

Figure S15 (xviii). HRMS spectrum of compound 5.

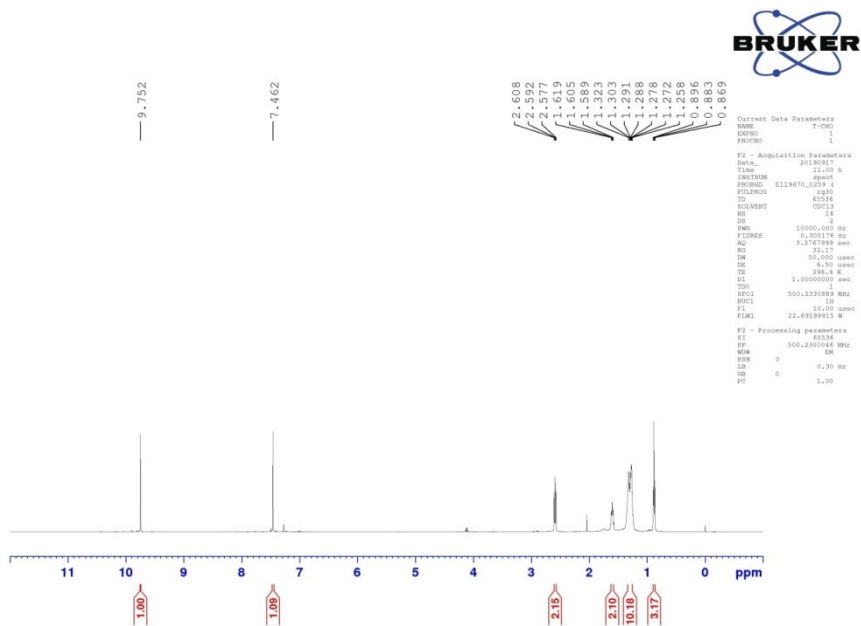

Figure S15 (xix). <sup>1</sup>H NMR spectrum of compound 6.

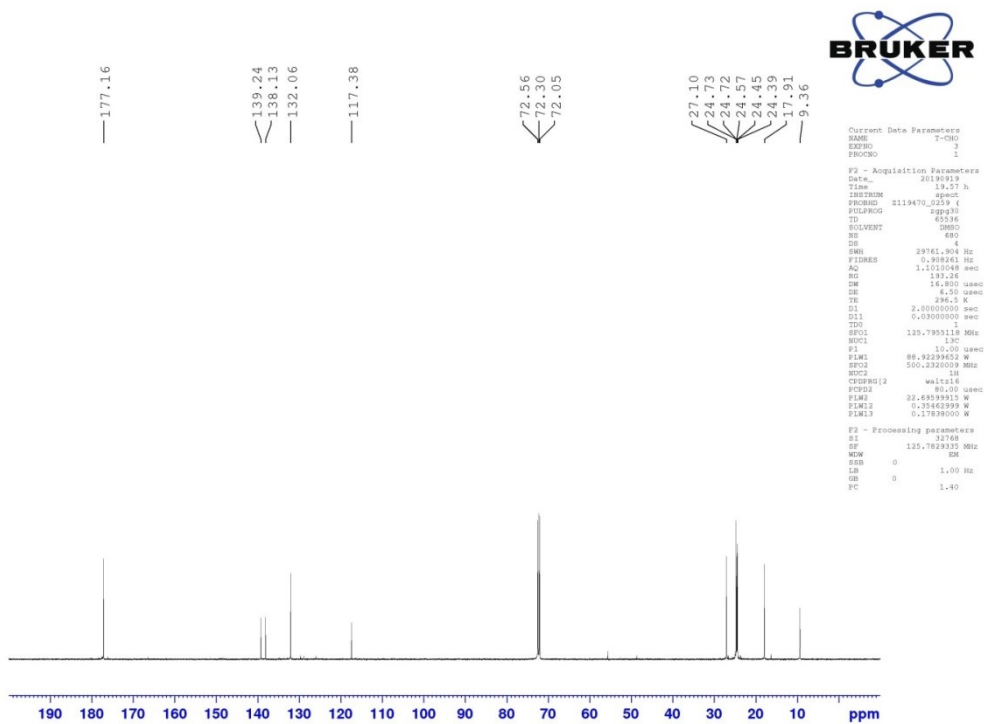

Figure S15 (xx). <sup>13</sup>C NMR spectrum of compound 6.

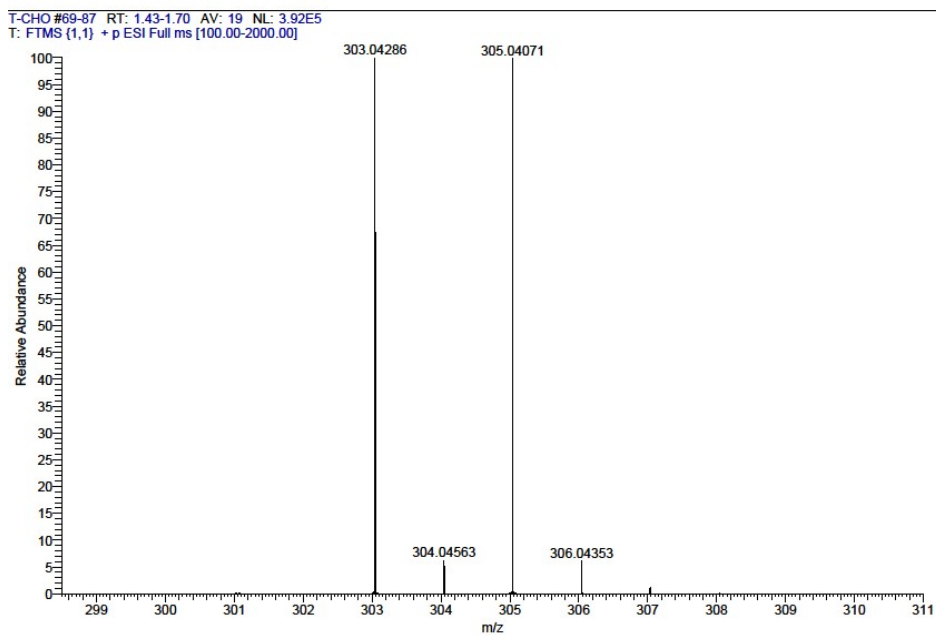

Figure S15 (xxi). HRMS spectrum of compound 6.

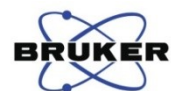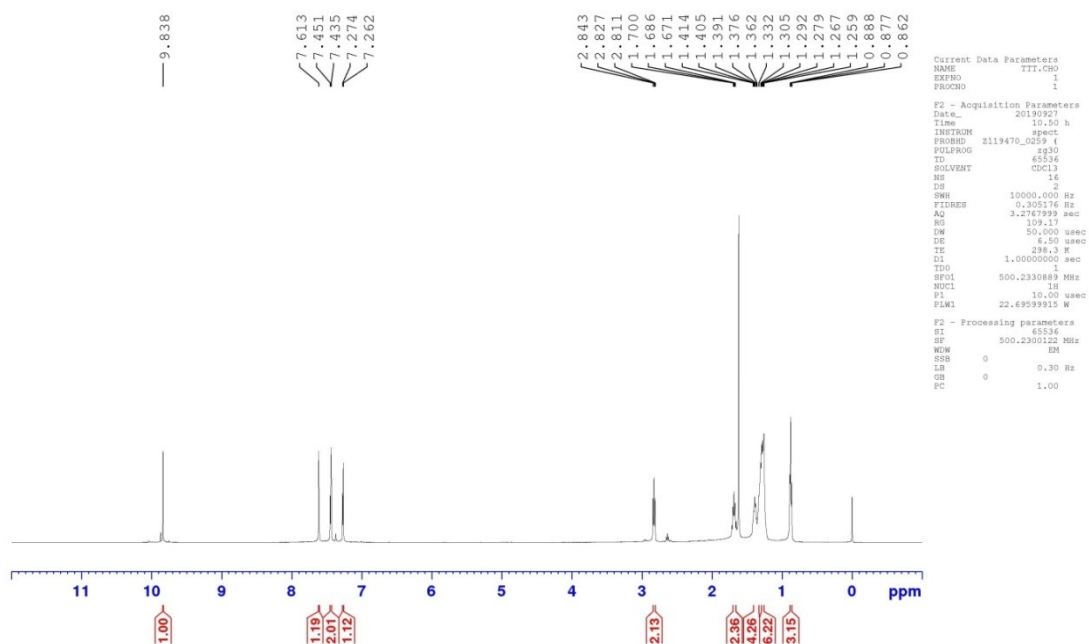

Figure S15 (xxii). <sup>1</sup>H NMR spectrum of compound 7.

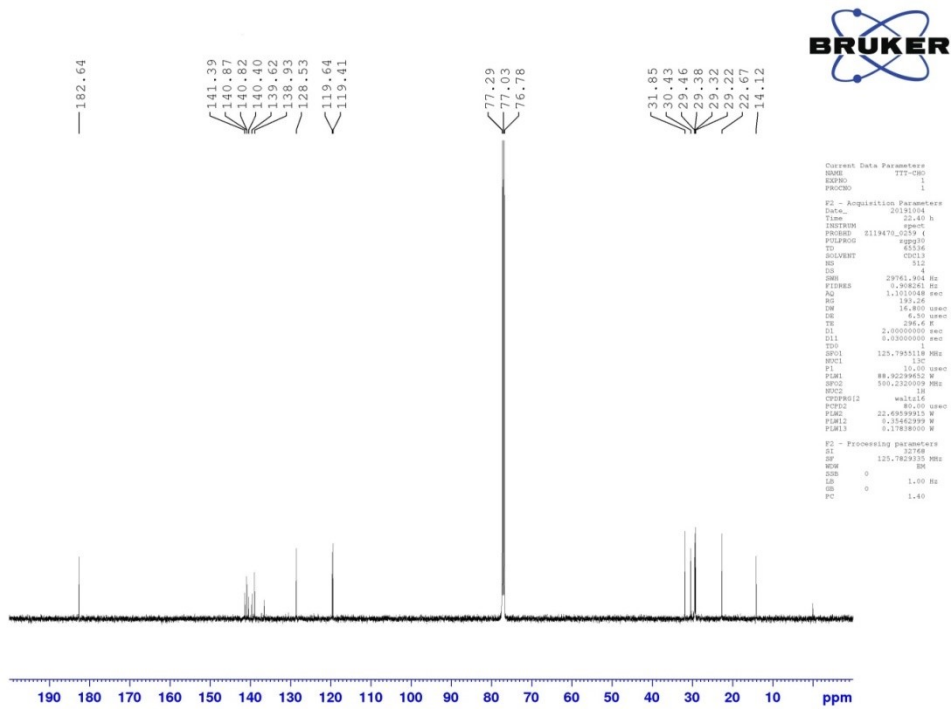

Figure S15 (xxiii).  $^{13}\text{C}$  NMR spectrum of compound 7.

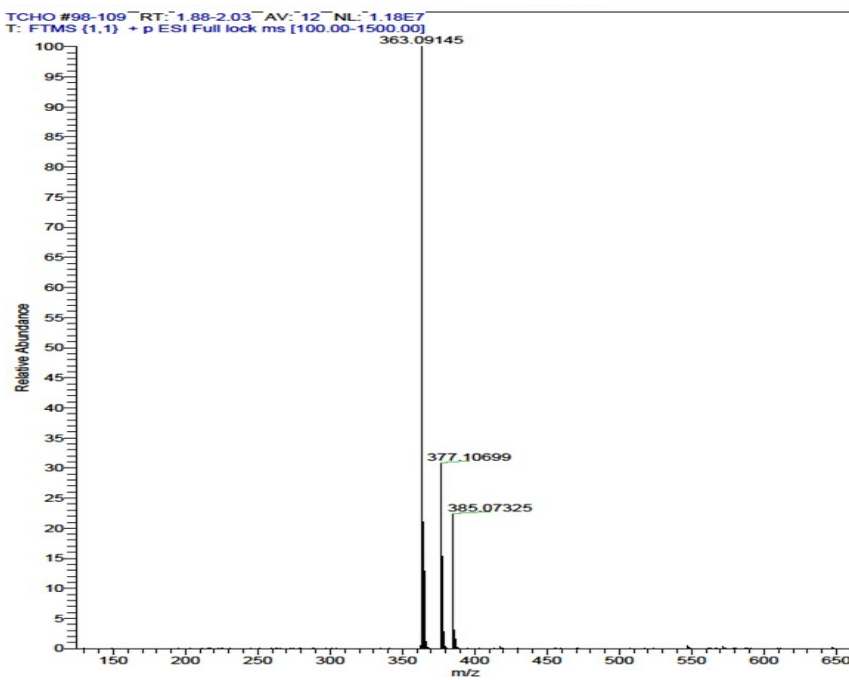

Figure S15 (xxiv). HRMS spectrum of compound 7.



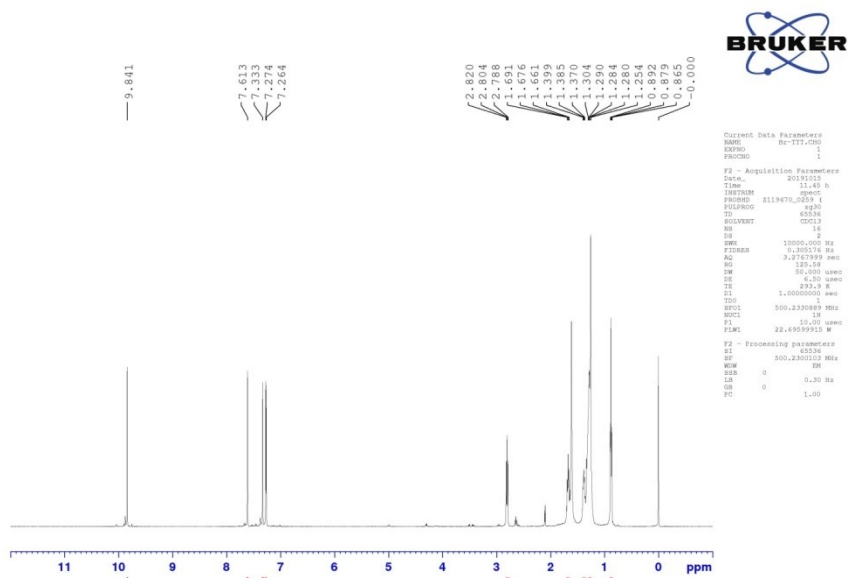

Figure S15 (xxv). <sup>1</sup>H NMR spectrum of compound 8.

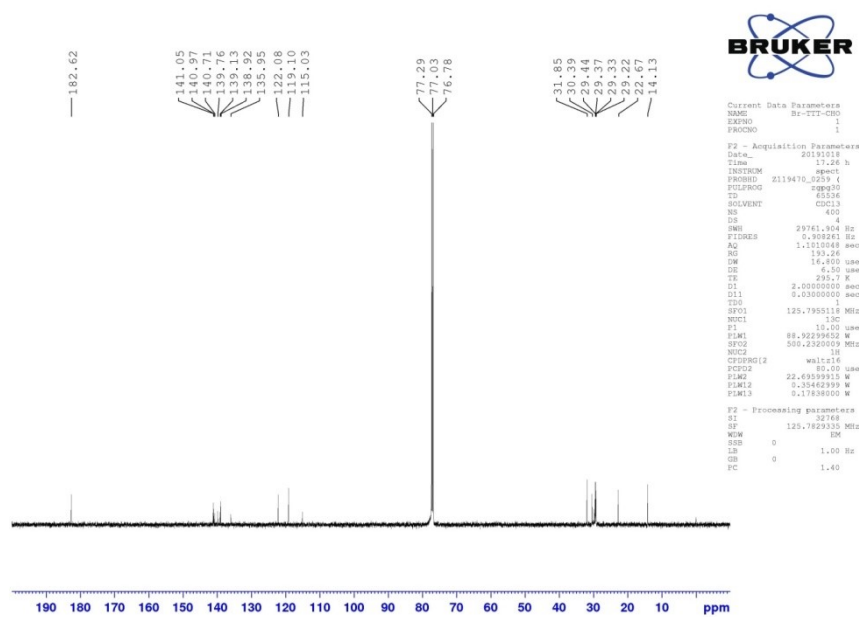

Figure S15 (xxvi). <sup>13</sup>C NMR spectrum of compound 8.

Br-TTCHO #115 RT: 2.42 AV: 1 NL: 1.13E6  
T: FTMS (1,1) + p ESI Full lock ms [100.00-1500.00]

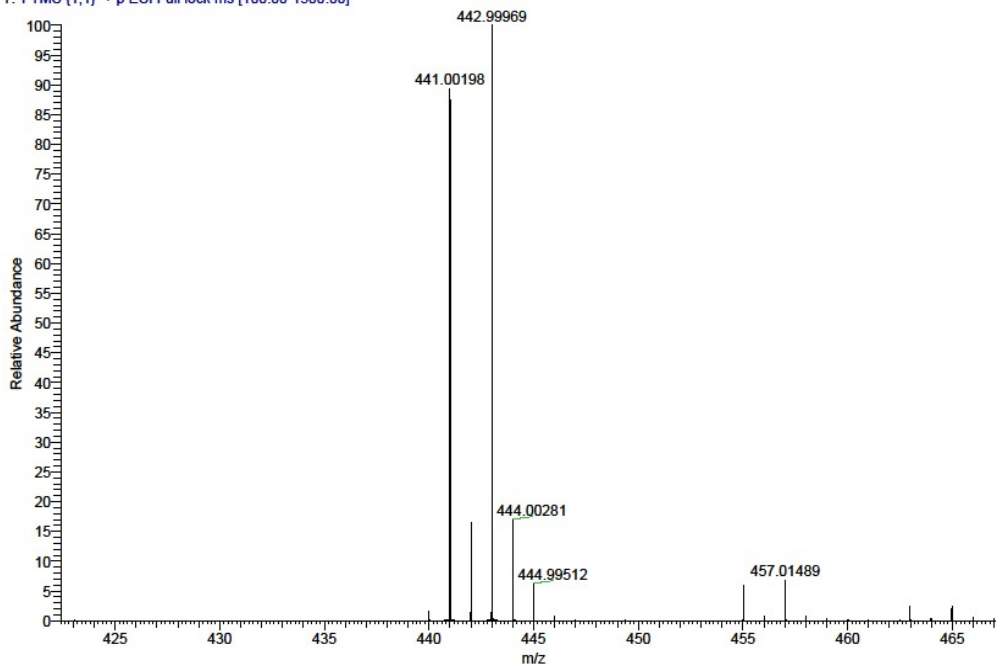

Figure S15 (xxvii). HRMS spectrum of compound 8.

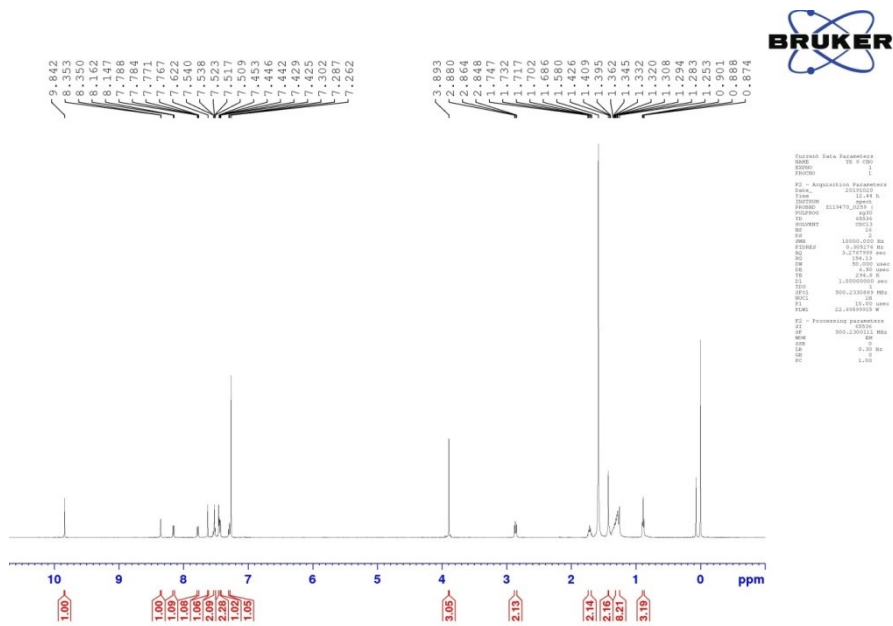

Figure S15 (xxviii). <sup>1</sup>H NMR spectrum of compound 9.

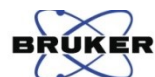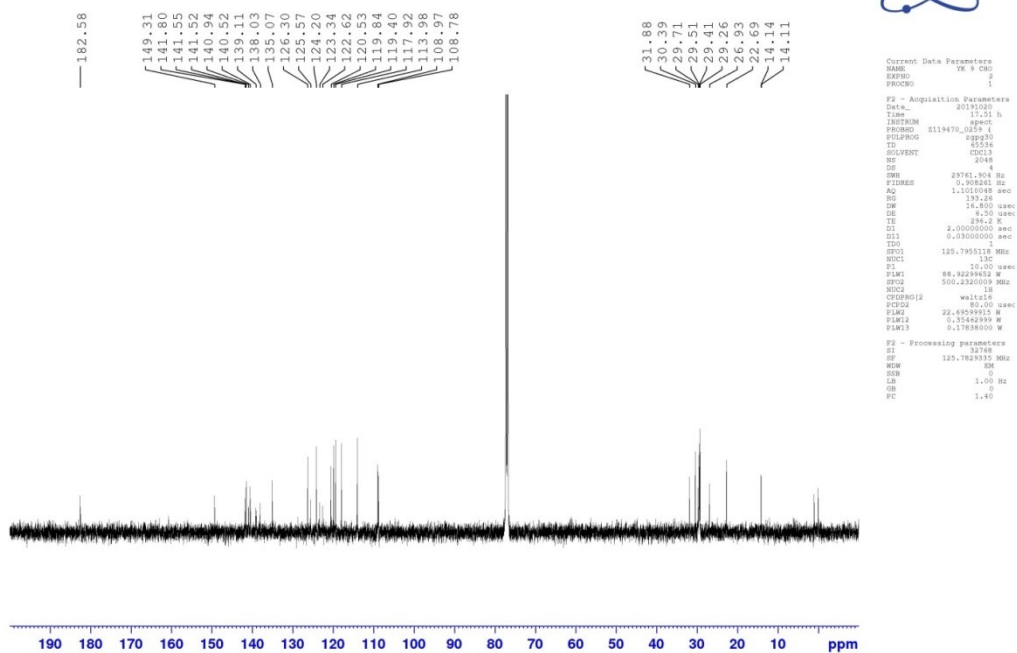

Figure S15 (xxix).  $^{13}\text{C}$  NMR spectrum of compound 9.

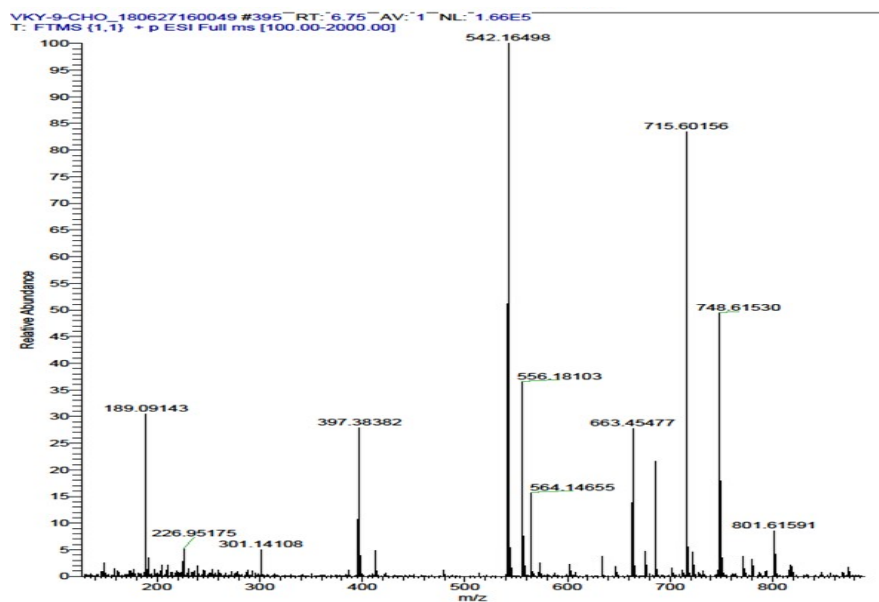

Figure S15 (xxx). HRMS spectrum of compound 9.

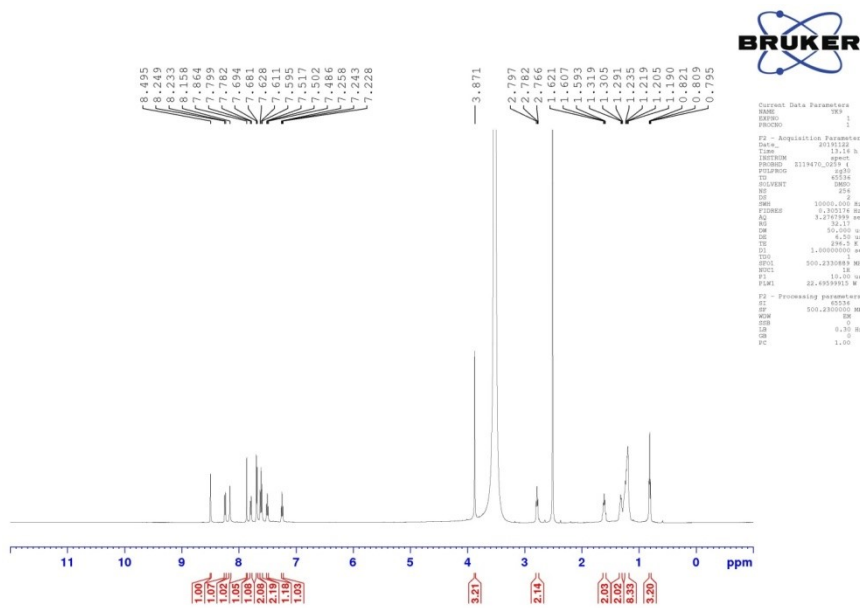

Figure S15 (xxxi). <sup>1</sup>H NMR spectrum of YK 9 dye.

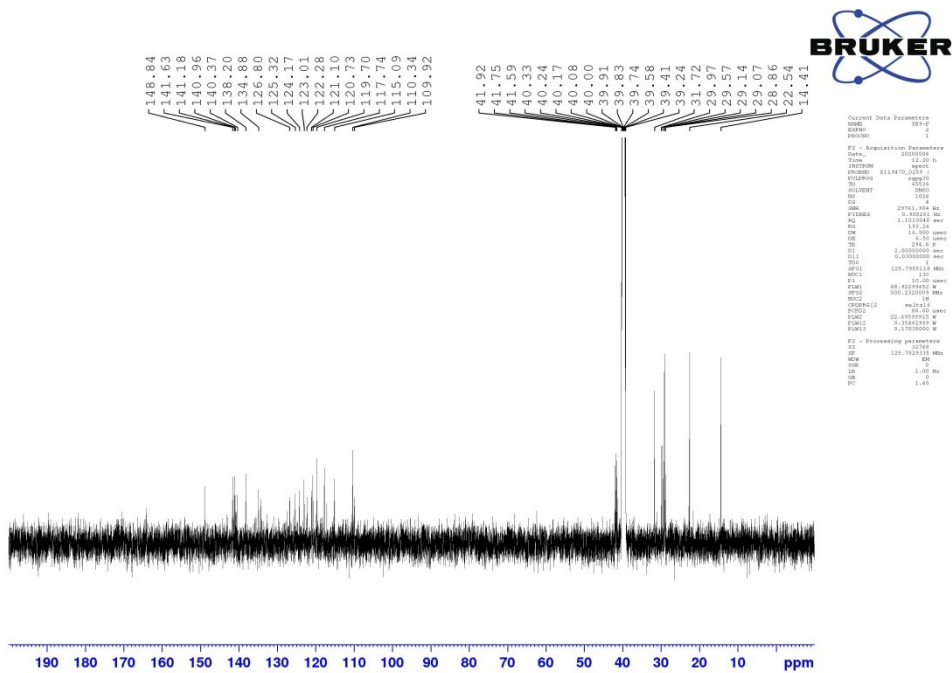

Figure S15 (xxxii). <sup>13</sup>C NMR spectrum of YK 9 dye.

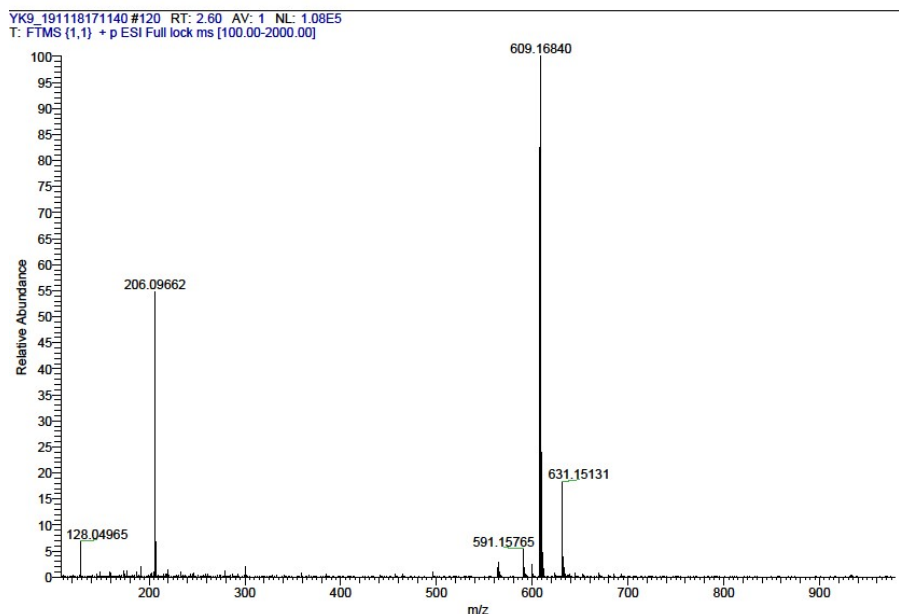

**Figure S15 (xxxiii).** HRMS spectrum of YK 9 dye.

**Figure S15 (xxxiv).** ATR-FTIR spectra of all major intermediates and YK8 and YK 9 dyes.

Compound 1

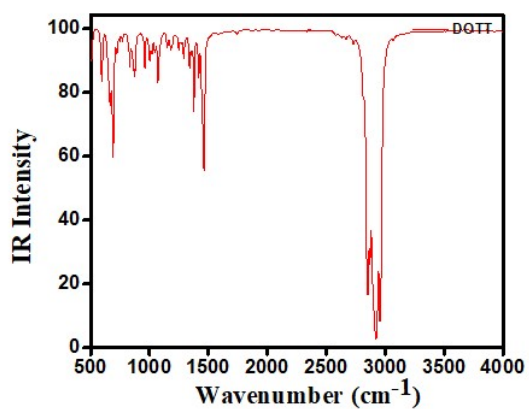

- 2954 - C-H stretch Alkane
- 2922 - C-H stretch Alkane
- 2852 - C-H stretch Alkane
- 1462 - -CH<sub>2</sub> scissor
- 1417 - aromatic C=C stretch
- 1433- thiophene ring stretch
- 1375 - -CH<sub>3</sub> bend
- 1070 - alkane C-C stretch
- 1290- aromatic C-H in plane bend
- 900-675 aromatic C-H out of plane bend
- 721- CH<sub>2</sub> rock
- 594 - aromatic C=C out of plane bending

### Compound 2

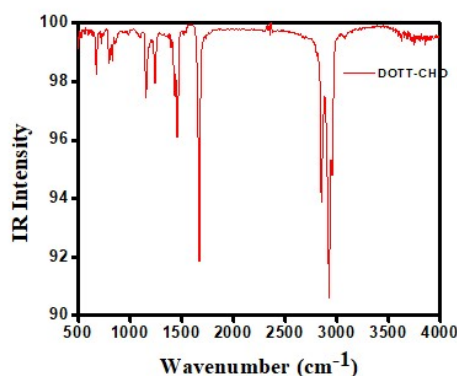

- 2954 - C-H stretch Alkane
- 2924 - C-H stretch Alkane
- 2850 - C-H stretch Alkane
- 1670 - Ar-conjugated C=O stretch - aldehyde
- 1456 - C-H bending methyl group
- 1433 - thiophene ring stretching
- 1393 - C-H bending aldehyde
- 1242 - aromatic C-H in plane bend
- 1155 - alkane C-C stretch
- 721 - CH<sub>2</sub> rock
- 900-675 aromatic C-H out of plane bend

### Compound 3

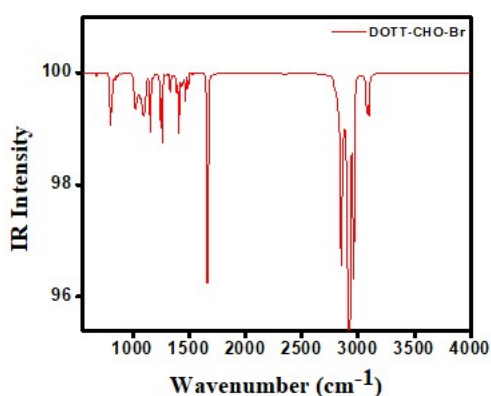

- 3079 - Aromatic C-H stretch
- 2960 - C-H stretch Alkane
- 2920 - C-H stretch Alkane
- 2850 - C-H stretch Alkane
- 1662 - Ar-conjugated C=O stretch - aldehyde
- 1467 - C-H bending methyl group
- 1390 - C-H bending aldehyde
- 1245 - aromatic C-H in plane bend
- 1156 - alkane C-C stretch
- 900-690 aromatic C-H out of plane bend

### Compound 4

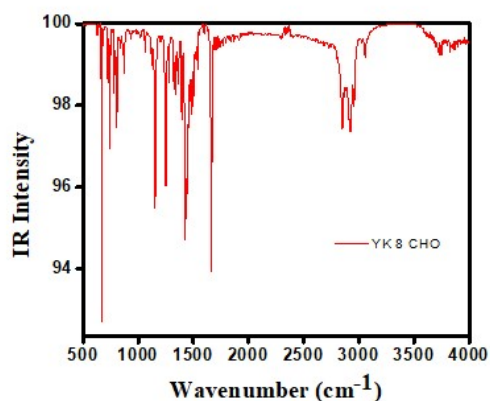

- 3057 - Aromatic C-H stretch
- 2954 - C-H stretch Alkane
- 2924 - C-H stretch Alkane
- 2848 - C-H stretch Alkane
- 1664 - Ar-conjugated C=O stretch - aldehyde
- 1427 - thiophene ring stretching
- 1393 - C-H bending aldehyde
- 1249 - aromatic C-H in plane bend
- 1153 - alkane C-C stretch
- 723 - CH<sub>2</sub> rock
- 900-690 aromatic C-H out of plane bend



YK 8

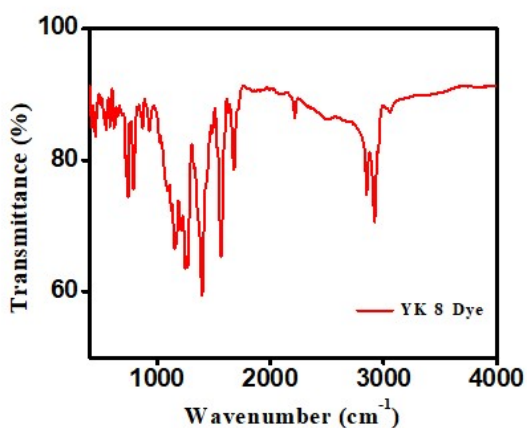

- 3060 – Aromatic C-H stretch
- 2920 – C-H stretch Alkane
- 2851 - C-H stretch Alkane
- 2216 – C-N stretch Nitrile
- 1678 – C=O stretch conjugated carboxylic acid
- 1563 – aromatic C=C stretch
- 1397 – aromatic C=C stretch
- 1267 - aromatic C-H in plane bend
- 900-690 aromatic C-H out of plane bend
- 723 – CH<sub>2</sub> Rocking

Compound 5

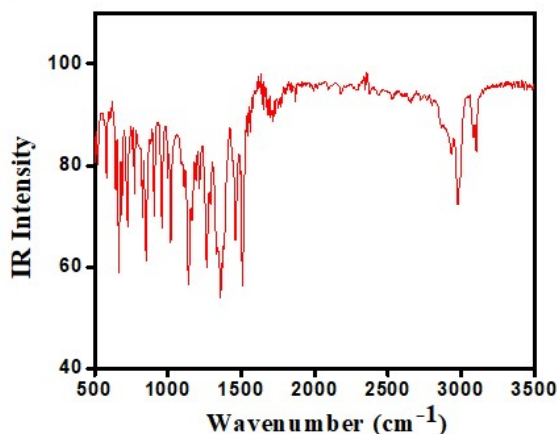

- 3103 - Aromatic C-H stretch
- 3084 - Aromatic C-H stretch
- 2976 - C-H stretch Alkane
- 2933 - C-H stretch Alkane
- 1460 - aromatic C=C stretch
- 1357 - -CH<sub>3</sub> bend
- 1265 - aromatic C-H in plane bend
- 1139 - alkane C-C stretch
- 900-675 aromatic C-H out of plane bend

Compound 6

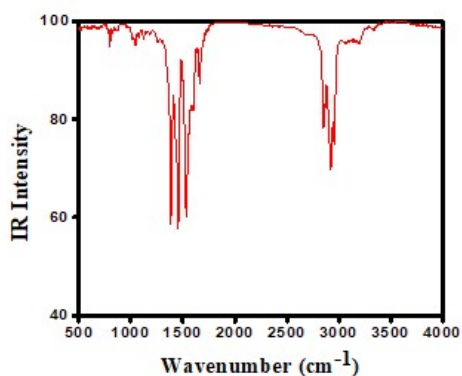

- 3089 - Aromatic C-H stretch
- 2956 - C-H stretch Alkane
- 2922 - C-H stretch Alkane
- 2870 - C-H stretch Alkane
- 1665 - Ar-conjugated C=O stretch - aldehyde
- 1531 - aromatic C=C stretch
- 1456 - -CH<sub>2</sub> scissor
- 1384 - C-H bending aldehyde
- 1253 - aromatic C-H in plane bend
- 900-675 aromatic C-H out of plane bend

Compound 7

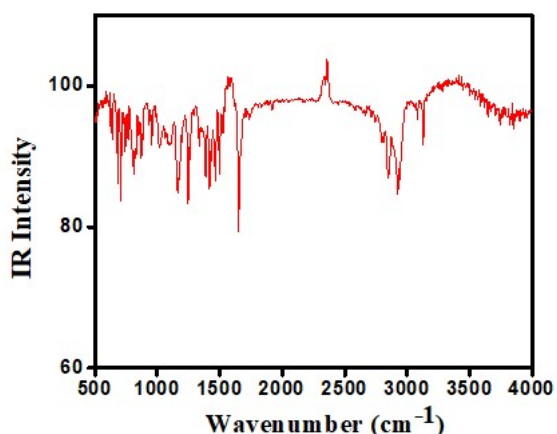

- 3130 - Aromatic C-H stretch
- 3082 - Aromatic C-H stretch
- 2943 - C-H stretch Alkane
- 2926 - C-H stretch Alkane
- 2848 - C-H stretch Alkane
- 1651 - Ar-conjugated C=O stretch - aldehyde
- 1496 - aromatic C=C stretch
- 1465 - -CH<sub>2</sub> scissor
- 1386 - C-H bending aldehyde
- 1246 - aromatic C-H in plane bend
- 1165 - alkane C-C stretch
- 900-675 aromatic C-H out of plane bend

Compound 8

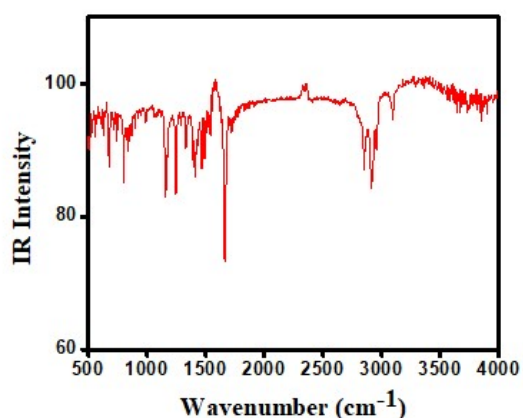

- 3097 - Aromatic C-H stretch
- 2956 - C-H stretch Alkane
- 2922 - C-H stretch Alkane
- 2852 - C-H stretch Alkane
- 1662 - Ar-conjugated C=O stretch - aldehyde
- 1490 - aromatic C=C stretch
- 1467 - -CH<sub>2</sub> scissor
- 1390 - C-H bending aldehyde
- 1246 - aromatic C-H in plane bend
- 1159 - alkane C-C stretch
- 900-675 aromatic C-H out of plane bend

Compound 9

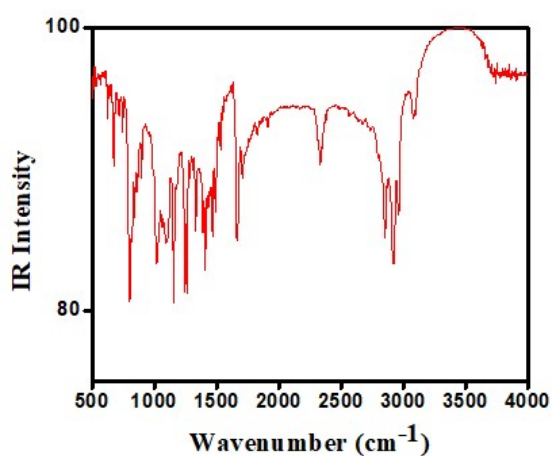

- 3097 - Aromatic C-H stretch
- 3080 - Aromatic C-H stretch
- 2961 - C-H stretch Alkane
- 2921 - C-H stretch Alkane
- 2849 - C-H stretch Alkane
- 1663 - Ar-conjugated C=O stretch - aldehyde
- 1534 - aromatic C=C stretch
- 1491 - aromatic C=C stretch
- 1467 - -CH<sub>2</sub> scissor
- 1390 - aromatic C=C stretch
- 1245 - aromatic C-H in plane bend
- 1156 - alkane C-C stretch
- 900-690 aromatic C-H out of plane bend



YK 9

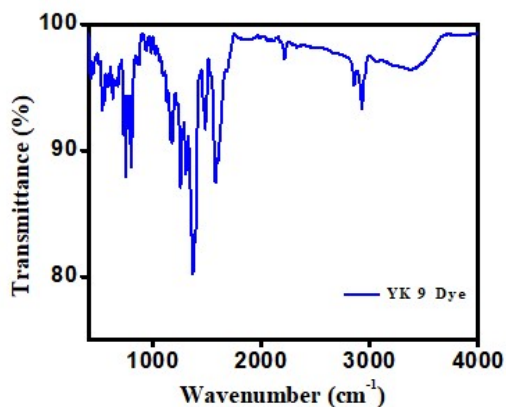

- 3070 - Aromatic C-H stretch
- 2924 - C-H stretch Alkane
- 2852 - C-H stretch Alkane
- 2212 - C-N stretch Nitrile
- 1679 - C=O stretch conjugated carboxylic acid
- 1574 - aromatic C=C stretch
- 1364 - aromatic C=C stretch
- 1248 - aromatic C-H in plane bend
- 900-690 aromatic C-H out of plane bend
- 727 - CH<sub>2</sub> Rocking

ATR-FTIR spectra of all major intermediates and YK8 and YK 9 dyes.

**TABLES**

|             | $V_{oc}$<br>(mV) | $J_{sc}$<br>(mAcm <sup>-2</sup> ) | $FF$<br>(%)  | Efficiency (%) |
|-------------|------------------|-----------------------------------|--------------|----------------|
| YK 8_(6μm)  | 699 ± 1          | 14.67 ± 0.12                      | 64.52 ± 0.14 | 6.62 ± 0.04    |
| YK 9_(6μm)  | 650 ± 4          | 14.88 ± 0.29                      | 67.63 ± 0.60 | 6.55 ± 0.21    |
| YK 8_(10μm) | 691 ± 1          | 13.71 ± 0.04                      | 66.49 ± 0.09 | 6.30 ± 0.02    |
| YK 9_(10μm) | 625 ± 2          | 12.71 ± 0.04                      | 69.35 ± 0.18 | 5.51 ± 0.02    |

**Table S1.** Tabulated PV data for optimization of semiconductor architecture for YK 8 and YK 9 without CDCA.

**(a) YK 8**

| CDCA<br>Concentration | $V_{oc}$<br>(mV) | $J_{sc}$<br>(mAcm <sup>-2</sup> ) | $FF$<br>(%)  | Efficiency<br>(%) |
|-----------------------|------------------|-----------------------------------|--------------|-------------------|
| w.o CDCA              | 699 ± 1          | 14.67 ± 0.12                      | 64.52 ± 0.14 | 6.62 ± 0.04       |
| 1 mM CDCA             | 670 ± 1          | 17.23 ± 0.22                      | 64.86 ± 0.12 | 7.49 ± 0.06       |
| 2.5 mM CDCA           | 651 ± 1          | 16.83 ± 0.02                      | 67.39 ± 0.16 | 7.37 ± 0.02       |
| 5 mM CDCA             | 660 ± 1          | 17.91 ± 0.7                       | 62.71 ± 0.09 | 7.40 ± 0.02       |
| 10 mM CDCA            | 644 ± 3          | 13.89 ± 0.76                      | 67.26 ± 0.48 | 6.02 ± 0.12       |

**(b) YK 9**

| CDCA<br>Concentration | $V_{oc}$<br>(mV) | $J_{sc}$<br>(mAcm <sup>-2</sup> ) | $FF$<br>(%)  | Efficiency<br>(%) |
|-----------------------|------------------|-----------------------------------|--------------|-------------------|
| w.o. CDCA             | 650 ± 4          | 14.88 ± 0.29                      | 67.63 ± 0.60 | 6.55 ± 0.21       |
| 1 mM CDCA             | 594 ± 1          | 12.58 ± 0.04                      | 63.83 ± 0.74 | 4.77 ± 0.05       |
| 2.5 mM CDCA           | 586 ± 2          | 14.04 ± 0.05                      | 64.99 ± 0.43 | 5.39 ± 0.03       |
| 5 mM CDCA             | 710 ± 2          | 14.10 ± 0.10                      | 67.93 ± 0.54 | 6.90 ± 0.10       |
| 10 mM CDCA            | 630 ± 4          | 13.43 ± 0.14                      | 64.31 ± 0.33 | 5.44 ± 0.07       |

**Table S2.** Tabulated PV data for optimization of co-adsorbent concentration (a) YK 8 and (b) YK 9.

|      | $V_{oc}$<br>(mV) | $J_{sc}$<br>(mAcm <sup>-2</sup> ) | FF<br>(%)    | Efficiency<br>(%) |
|------|------------------|-----------------------------------|--------------|-------------------|
| MK 2 | 751 ± 1          | 15.11 ± 0.07                      | 68.26 ± 0.15 | 7.74 ± 0.04       |

**Table S3.** Solar cell characteristics of DSCs based on MK 2 sensitizer under 1 sun AM 1.5G irradiation.

|      | $V_{oc}$<br>(mV) | $J_{sc}$<br>(mAcm <sup>-2</sup> ) | Integrated<br>$J_{sc}$<br>(mAcm <sup>-2</sup> ) | FF<br>(%)    | Efficiency<br>(%) |
|------|------------------|-----------------------------------|-------------------------------------------------|--------------|-------------------|
| YK 8 | 790 ± 6          | 17.24 ± 0.10                      | 17.02                                           | 68.93 ± 0.29 | 9.39 ± 0.18       |
| YK 9 | 750 ± 1          | 14.26 ± 0.02                      | 13.71                                           | 69.91 ± 0.35 | 7.48 ± 0.03       |

**Table S4.** Summary of photovoltaic performance of DSCs based on YK 8 and YK 9 dyes after ageing the devices for 2700 h.

| Intensity | Input Power<br>( $\mu$ W/cm <sup>2</sup> ) | Output Power<br>( $\mu$ W/cm <sup>2</sup> ) | $V_{oc}$<br>(mV) | $J_{sc}$<br>( $\mu$ Acm <sup>-2</sup> ) | FF<br>(%)    | Efficiency<br>(%) |
|-----------|--------------------------------------------|---------------------------------------------|------------------|-----------------------------------------|--------------|-------------------|
| 700 Lux   | 160                                        | 32.69                                       | 638 ± 7          | 89 ± 2                                  | 58.31 ± 1.21 | 20.43 ± 0.57      |
| 1000 Lux  | 240                                        | 57.72                                       | 649 ± 7          | 132 ± 4                                 | 66.26 ± 1.20 | 24.05 ± 0.47      |
| 1500 Lux  | 360                                        | 92.65                                       | 669 ± 6          | 195 ± 11                                | 71.99 ± 1.69 | 25.74 ± 0.46      |
| 2000 Lux  | 480                                        | 129.41                                      | 669 ± 1          | 256 ± 10                                | 76.59 ± 2.11 | 26.96 ± 0.49      |

**Table S5:** Tabulated photovoltaic results of DSCs under Osram 14 W T2 cool day light fluorescent tube illumination for MK 2 sensitizer at 700 lux, 1000 lux, 1500 lux and 2000 lux intensities.

**Table S6.** Comparison of the indoor photovoltaic performance of YK 8 and YK 9 sensitizers with other dyes reported so far which are measured under similar conditions using iodide/triiodide electrolyte.

|             | Intensity<br>(lux)/ Light<br>source | Input<br>power<br>( $\mu\text{Wcm}^{-2}$ ) | $V_{oc}$<br>(mV)             | $J_{sc}$<br>( $\mu\text{Acm}^{-2}$ ) | FF<br>(%)                          | Efficiency<br>(%)                  | Reference           |
|-------------|-------------------------------------|--------------------------------------------|------------------------------|--------------------------------------|------------------------------------|------------------------------------|---------------------|
| <b>YK 8</b> | <b>1000/<br/>T2 CFL</b>             | <b>240</b>                                 | <b>669<math>\pm</math> 7</b> | <b>141 <math>\pm</math> 3</b>        | <b>72.10 <math>\pm</math> 1.28</b> | <b>28.70 <math>\pm</math> 1.14</b> | <b>Present Work</b> |
| YK 8        | 1500/<br>T2 CFL                     | 360                                        | 679 $\pm$ 1                  | 200 $\pm$ 2                          | 80.03 $\pm$ 2.30                   | 30.24 $\pm$ 1.23                   | Present Work        |
| <b>YK 9</b> | <b>1000/<br/>T2 CFL</b>             | <b>240</b>                                 | <b>589<math>\pm</math> 7</b> | <b>103<math>\pm</math> 2</b>         | <b>58.39<math>\pm</math> 1.55</b>  | <b>14.21 <math>\pm</math> 0.56</b> | <b>Present Work</b> |
| YK 9        | 1500/<br>T2 CFL                     | 360                                        | 608 $\pm$ 6                  | 154 $\pm$ 4                          | 69.51 $\pm$ 2.26                   | 17.84 $\pm$ 1.17                   | Present Work        |
| TY6         | 1200/T5                             | 345                                        | 671                          | 164                                  | 77.8                               | 24.43                              | [1]                 |
| GJ-P        | 1200/T5                             | 352.3                                      | 532                          | 117.49                               | 73.4                               | 12.14                              | [2]                 |
| GJ-BP       | 1200/T5                             | 352.3                                      | 508                          | 127.29                               | 72.2                               | 13.26                              | [2]                 |
| MM-6+MM-3   | 1000/TL84                           | 185                                        | 598 $\pm$ 3                  | 137 $\pm$ 3.8                        | 65 $\pm$ 0.25                      | 28.7 $\pm$ 1.0                     | [3]                 |
| MM-6        | 1000/TL84                           | 185                                        | 570 $\pm$ 4                  | 128 $\pm$ 3.7                        | 70 $\pm$ 1.22                      | 27.6 $\pm$ 1.8                     | [3]                 |
| MM-3        | 1000/TL84                           | 185                                        | 436 $\pm$ 3                  | 65.8 $\pm$ 2.5                       | 62 $\pm$ 0.55                      | 9.6 $\pm$ 0.6                      | [3]                 |
| YL4         | 1025/T5                             | 330                                        | 576 $\pm$ 6                  | 224 $\pm$ 6                          | 63 $\pm$ 1                         | 25.0 $\pm$ 0.8                     | [4]                 |
| YL3         | 1025/T5                             | 330                                        | 552 $\pm$ 7                  | 143 $\pm$ 2                          | 65 $\pm$ 1                         | 15.6 $\pm$ 0.2                     | [4]                 |
| YL2         | 1025/T5                             | 330                                        | 542 $\pm$ 6                  | 133 $\pm$ 6                          | 56 $\pm$ 1                         | 12.4 $\pm$ 0.3                     | [4]                 |
| TY6         | 1000/CFL                            |                                            | 769 $\pm$ 6                  | 89.51 $\pm$ 1.76                     | 78 $\pm$ 1.64                      | 16.5 $\pm$ 0.4                     | [5]                 |
| TY6         | 1000/LED                            |                                            | 766 $\pm$ 6                  | 84.96 $\pm$ 1.74                     | 78 $\pm$ 1.71                      | 15.1 $\pm$ 0.4                     | [5]                 |
| AN-11       | 1000/CFL                            |                                            | 972 $\pm$ 9                  | 44.35 $\pm$ 0.77                     | 69 $\pm$ 1.24                      | 9.2 $\pm$ 0.3                      | [5]                 |
| AN-11       | 1000/LED                            |                                            | 977 $\pm$ 8                  | 45.51 $\pm$ 0.80                     | 70 $\pm$ 1.28                      | 9.2 $\pm$ 0.3                      | [5]                 |
| D-Dye       | 1200/T5                             |                                            | 500 $\pm$ 5                  | 81 $\pm$ 71                          | 60 $\pm$ 0.29                      | 12.95 $\pm$ 0.29                   | [6]                 |
| N-719       | 1200/T5                             |                                            | 550 $\pm$ 3                  | 83.5 $\pm$ 6                         | 65 $\pm$ 4                         | 12.79 $\pm$ 1.6                    | [7]                 |
| RY3         | 1000/TL84                           | 185                                        | 590 $\pm$ 3.6                | 85.8 $\pm$ 3                         | 66.33 $\pm$ 0.53                   | 18.15 $\pm$ 1                      | [8]                 |
| N719+RY3    | 1000/TL84                           | 185                                        | 569 $\pm$ 3.7                | 120 $\pm$ 3                          | 66.26 $\pm$ 1.13                   | 24.45 $\pm$ 1.12                   | [8]                 |
| N-719       | 1000/TL84                           | 185                                        | 550 $\pm$ 4.2                | 110 $\pm$ 4                          | 64.62 $\pm$ 1.51                   | 21.13 $\pm$ 1.49                   | [8]                 |
| Dye 1       | 1200/T5                             | --                                         | 530                          | 124.4                                | 63                                 | 10.73                              | [9]                 |

**Table S7:** List of highest reported indoor performance in DSCs using copper electrolyte.

|                    | Intensity<br>(lux)/ Light<br>source | Input<br>power<br>( $\mu\text{Wcm}^{-2}$ ) | $V_{oc}$<br>(mV) | $J_{sc}$<br>( $\mu\text{Acm}^{-2}$ ) | FF<br>(%) | Efficiency<br>(%) | Year | Reference |
|--------------------|-------------------------------------|--------------------------------------------|------------------|--------------------------------------|-----------|-------------------|------|-----------|
| <b>D35 + XY1</b>   | 1000/Osram<br>930                   | 306.6                                      | 797              | 138.0                                | 80        | 28.9              | 2017 | [10]      |
| <b>XY1b + Y123</b> | 1000/Osram<br>930                   | 318.2                                      | 878              | 149.3                                | 77        | 31.8              | 2018 | [11]      |
| <b>L350</b>        | 1000                                |                                            | 837              | 132.9                                | 78        | 28.4              | 2018 | [12]      |
| <b>XY1 + 5T</b>    | 1000/Osram<br>930                   | 303.1                                      | 860              | 131.2                                | 78        | 29.2              | 2020 | [13]      |
| <b>XY1</b>         | 1000/<br>Osram 930                  | 303.1                                      | 850              | 114.2                                | 78        | 24.6              | 2020 | [14]      |
| <b>XY1 + L1</b>    | 1000/<br>Osram 930                  | 303.1                                      | 910              | 147.0                                | 77        | 34.0              | 2020 | [14]      |
| <b>XY1b + MS5</b>  | 1000/<br>Osram 930                  | 318.2                                      | 980              | 138.2                                | 81        | 34.5              | 2021 | [15]      |

**Table S8:** YK 8 dye cost calculation**YK 8 Cost Calculation**

## 1. Compound 1

| Reagent                           | Market Price (₹) | Used (₹)     |
|-----------------------------------|------------------|--------------|
| 2,5-bis(tributylstannyl)thiophene | 5g= 14510        | 500mg= 1451  |
| 2-bromo-3-octylthiophene          | 5g=11033.40      | 436mg=962.1  |
| Dry toluene                       | 500ml=700        | 20ml=28      |
| $\text{Pd}_2(\text{dba})_3$       | 1g=8247.39       | 20mg=164.948 |
| $\text{P}(\text{o-tolyl})_3$      | 1g=1830          | 30mg= 54.9   |

Remarks : Product=303 mg= 2660.946₹  
1g= 8782₹

2. Compound 2

| Reagent               | Market Price (₹) | Used (₹)    |
|-----------------------|------------------|-------------|
| Compound 1            | 1g=8782          | 1g=8782     |
| N,N-dimethylformamide | 100ml=3696.30    | 1.8ml=66.53 |
| 1,2-dichloroethane    | 100ml=3774       | 20ml=754.8  |
| POCl <sub>3</sub>     | 500ml=670        | 0.3ml=0.402 |

Remarks : Product=800mg=9603.732 ₹  
1g= 12004.665₹

3. Compound 3

| Reagent                | Market Price (₹) | Used (₹)      |
|------------------------|------------------|---------------|
| Compound 2             | 1g=12004.665     | 500mg=6002.33 |
| N,N-dimethyl formamide | 100ml=3696.30    | 10ml=369.63   |
| N-bromosuccinimide     | 5g=2100          | 266mg=111.72  |

Remarks : Product=400mg=6483.6826₹  
1g= 16209.21₹

4. Compound 4

| Reagent                                            | Market Price (₹) | Used (₹)       |
|----------------------------------------------------|------------------|----------------|
| Compound 3                                         | 1g=16209.21      | 543mg=8801.59  |
| K <sub>2</sub> CO <sub>3</sub>                     | 100g=2842        | 276mg=7.844    |
| 9-methyl-9H-carbazole-3-boronic acid pinacol ester | 1g=6327          | 288mg=1822.176 |
| Toluene                                            | 500ml=700        | 20ml=28        |
| Pd(PPh <sub>3</sub> ) <sub>4</sub>                 | 1g=5790          | 30mg=173.7     |

Remarks : Product=565mg= 10833.31₹  
1g= 19174₹

## 5. YK 8 dye

| Reagent          | Market Price (₹) | Used (₹)     |
|------------------|------------------|--------------|
| Compound 4       | 1g=19174         | 200mg=3834.8 |
| Cyanoacetic acid | 25g=2297.70      | 130mg=11.95  |
| Dry chloroform   | 500ml=495        | 20ml=19.8    |
| Piperidine       | 100ml=4784.10    | 1ml=47.841   |

Remarks : Product=171mg=3914.391₹  
1g= 22891.18₹

## 6. Solvents and Materials used for extraction

| Reagent                         | Used (₹)        |
|---------------------------------|-----------------|
| Dichloromethane                 | 200ml = 135     |
| Na <sub>2</sub> SO <sub>4</sub> | 10g = 115.22    |
| Silica gel                      | 250g = 20068.80 |
| Hexane                          | 200ml = 271.2   |
| Chloroform                      | 100ml = 60      |
| Methanol                        | 50ml = 2        |

**Total Cost for making 1G YK 8 Dye = 43543.4 ₹ (Indian Rupee)**  
**~585 USD**  
**~492 Euro**

**Sigma-Aldrich (Merck) discontinued MK2 dye (Product No 728705) and other providers who are selling MK2 dye are 20 times or more to price of YK 8 dye**

### Solar Simulator and associated measuring set-up used for JV measurements

The current density versus voltage (J-V) curve of the fabricated DSCs were measured under AM 1.5 G irradiation ( $100 \text{ mWcm}^{-2}$ ) using Newport class AAA solar simulator (Oriel Sol3A, Model: 94023A, S/N: 438) having 450 W Xenon short arc lamp (6280NS, Newport). The intensity of illumination is measured with standard silicon reference cell (Model: 91150V, S/N: 1694) calibrated by Newport. The measurement is carried out using Keithley 2440 source measuring unit (S/N: 1235971) controlled by PVIV (Oriel Instruments) testing software provided by Newport. In order to avoid the overestimation of  $J_{sc}$  due to stray light, during all the photovoltaic characterizations, we used a black mask of aperture  $0.1256 \text{ cm}^2$  (radius - 2 mm) over the device with a total active area of  $0.31 \text{ cm}^2$ . Also, all the photovoltaic results reported are from the data obtained from 8 devices, and the error was estimated using the standard deviation method.

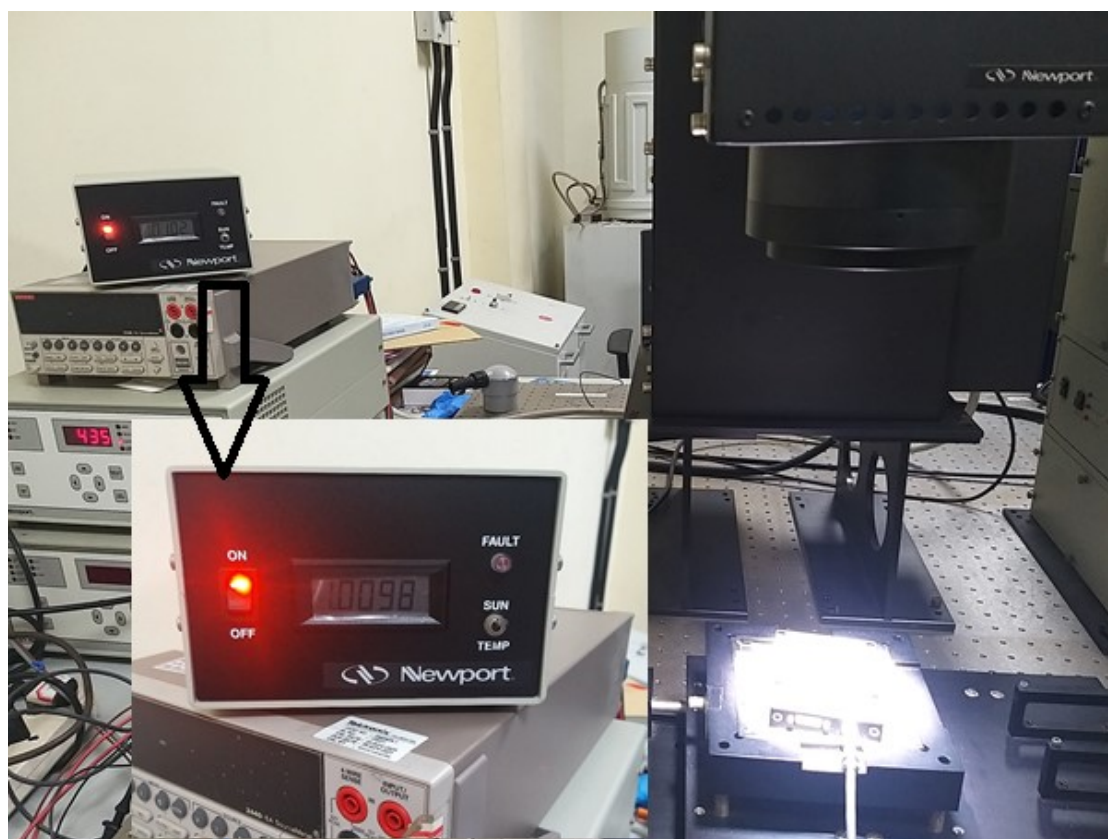

**Figure S16.** Newport class AAA solar simulator (Oriel Sol3A, Model: 94023A, S/N: 438).



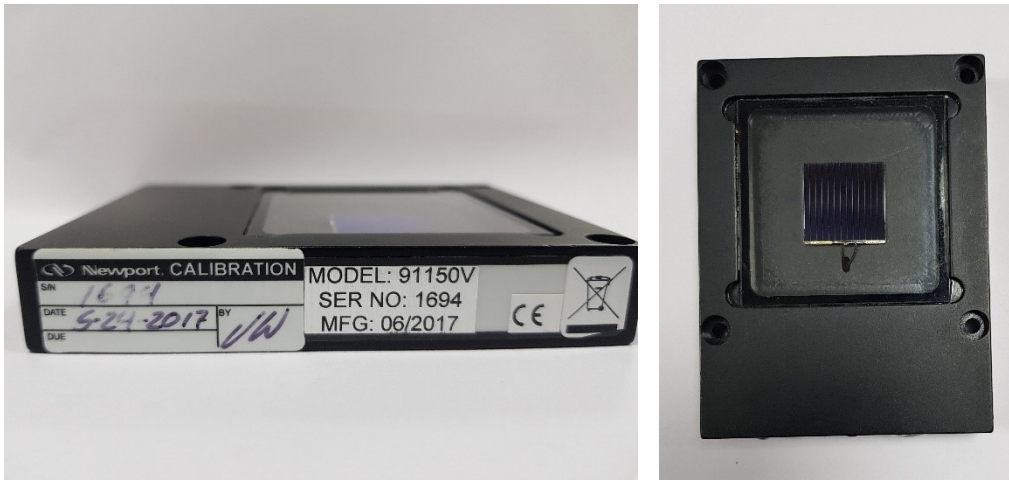

**Figure S17.** Standard silicon reference cell (Model: 91150V, S/N: 1694) calibrated by Newport.

### **IPCE Measurement System and associated measuring set-up used for measurements**

The incident photon-to-current conversion efficiency (IPCE) measurements were carried out in DC mode using the constant light source as 350 W Xenon arc lamp (6258, Newport, lamp house S/N: 876). The Cornerstone™ 260 UV-VIS Monochromator (Model: 74125, S/N: 310) is used to get the monochromatic light for the measurement, the reference is recorded using the detector (818-UV, S/N: 10878) calibrated and provided by Newport. The power meter (Model: 1918-R, S/N: 17953, Newport) is used for recording the measurement in each wavelength synchronised to the Cornerstone™ Monochromator using TracQ™ 6.5 data acquisition software provided by Newport. The measurement of reference silicon solar cell (QE Solar Cell, Newport) is being carried out to verify the measurement conditions.

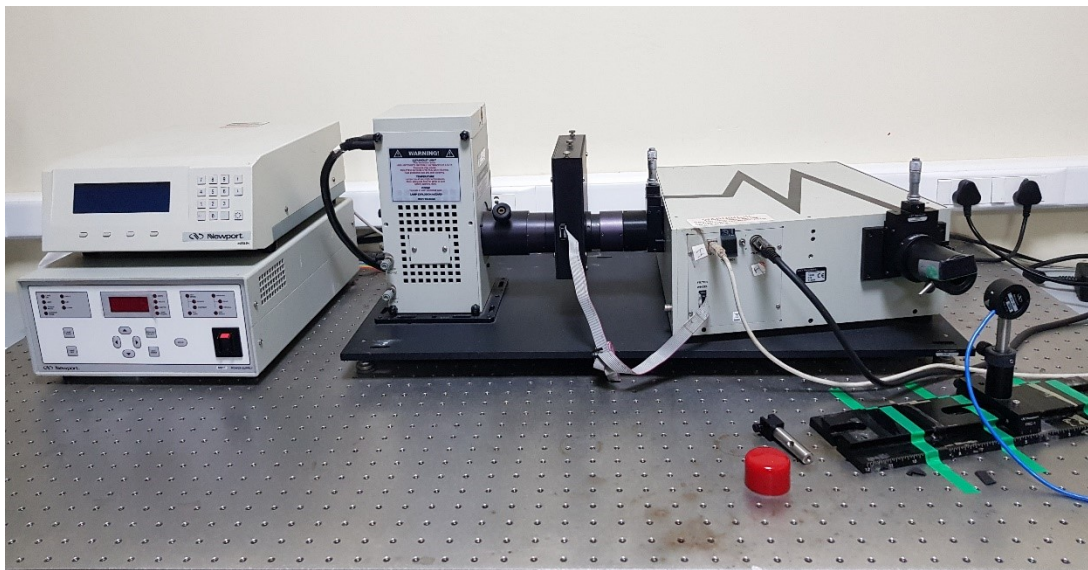

**Figure S18.** IPCE measurement setup.

**Detector (818-UV, S/N: 10878) calibrated and provided by Newport.**

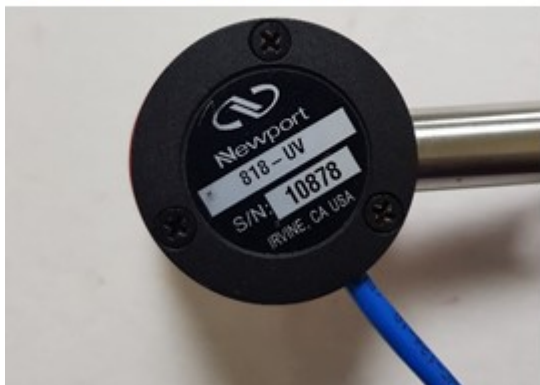

**Reference Si solar cell (Newport) for IPCE standardisation**

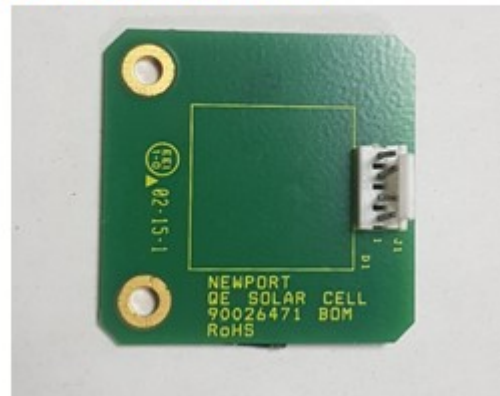

**Figure S19.** Detector and silicon reference cell for IPCE measurement.

## References

- [1] Y. S. Tingare, N. S. Vinh, H.-H. Chou, Y.-C. Liu, Y.-S. Long, T.-C. Wu, T.-C. Wei, C.-Y. Yeh, *Adv. Energy Mater.* **2017**, *7*, 1700032.
- [2] H. H. Chou, Y. C. Liu, G. Fang, Q. K. Cao, T. C. Wei, C. Y. Yeh, *ACS Appl. Mater. Interfaces* **2017**, *9*, 37786.
- [3] M. L. Jiang, J. J. Wen, Z. M. Chen, W. H. Tsai, T. C. Lin, T. J. Chow, Y. J. Chang, *ChemSusChem* **2019**, *12*, 3654.
- [4] C. T. Li, Y. L. Kuo, C. P. Kumar, P. T. Huang, J. T. Lin, *J. Mater. Chem. A* **2019**, *7*, 23225.
- [5] C. Chen, T. Kuo, C. Huang, Z. Jian, P. Hsiao, C. Wang, J. Lin, C. Chen, C. Chen, Y. Tung, M. Tsai, K. Huang, C. Chen, C. Hsu, Y. Chen, Z. Pei, Y. S. Tingare, H. Chou, C. Yeh, C. Lin, Y. Lee, H. Lin, H. Meng, P. Chou, C. Wu, *Prog. Photovoltaics Res. Appl.* **2020**, *28*, 111.
- [6] M. Chandra Sil, L. S. Chen, C. W. Lai, Y. H. Lee, C. C. Chang, C. M. Chen, *J. Power Sources* **2020**, *479*, 229095.
- [7] G. Kapil, Y. Ogomi, S. S. Pandey, T. Ma, S. Hayase, *J. Nanosci. Nanotechnol.* **2016**, *16*, 3183.
- [8] R.-Y. Huang, W.-H. Tsai, J.-J. Wen, Y. J. Chang, T. J. Chow, *J. Power Sources* **2020**, *458*, 228063.
- [9] F.-S. Lin, P. Priyanka, M.-S. Fan, S. Vegiraju, J.-S. Ni, Y.-C. Wu, Y.-H. Li, G.-H. Lee, Y. Ezhumalai, R.-J. Jeng, M.-C. Chen, K.-C. Ho, *J. Mater. Chem. C* **2020**, *8*, 15322.
- [10] M. Freitag, J. Teuscher, Y. Saygili, X. Zhang, F. Giordano, P. Liska, J. Hua, S. M. Zakeeruddin, J.-E. E. Moser, M. Grätzel, A. Hagfeldt, *Nat. Photonics* **2017**, *11*, 372.
- [11] Y. Cao, Y. Liu, S. M. Zakeeruddin, A. Hagfeldt, M. Grätzel, *Joule* **2018**, *2*, 1108.
- [12] Y. Liu, Y. Cao, W. Zhang, M. Stojanovic, M. I. Dar, P. Péchy, Y. Saygili, A. Hagfeldt, S. M. Zakeeruddin, M. Grätzel, *Angew. Chemie* **2018**, *130*, 14321.
- [13] E. Tanaka, H. Michaels, M. Freitag, N. Robertson, *J. Mater. Chem. A* **2020**, *8*, 1279.
- [14] H. Michaels, M. Rinderle, R. Freitag, I. Benesperi, T. Edvinsson, R. Socher, A. Gagliardi, M. Freitag, *Chem. Sci.* **2020**, *11*, 2895.
- [15] D. Zhang, M. Stojanovic, Y. Ren, Y. Cao, F. T. Eickemeyer, E. Socie, N. Vlachopoulos, J.-E. Moser, S. M. Zakeeruddin, A. Hagfeldt, M. Grätzel, *Nat. Commun.* **2021**, *12*, 1777.
